# Supplementary material for: Trophic Position of the Species and Site Trophic State Affect Diet Niche and Individual Specialization: From Apex Predator to Herbivore
Source: Biology (Basel). 2023 Aug 10;12(8):1113. doi: 10.3390/biology12081113 (PMC10452534; doi:10.3390/biology12081113)
Supplement: Supplementary file 1 [file biology-12-01113-s001.zip › 03 README_DataSet Vejrik et al.xlsx]

## Sheet: Most
Species	Individual	TL [mm]	W [kg]	Tissue	Identifier	Amount	d13C Primary data	d15N Primary data	d13C After centering	d15N After centering	d13Ccorr After normalization	TP d15N After normalization
Catfish	1	970	4.54	Muscle	MOSU1M	0.67	-20.7018	12.9292	-20.7018	12.9292	0.662313	2.17919
Catfish	1			Plasma	MOSU1P	0.744	-20.8991	16.0009	-21.4026	15.2187	0.594731	2.85255
Catfish	1			Blood	MOSU1B	0.742	-20.3605	15.196	-20.866	14.9487	0.646476	2.77316
Catfish	1			Fin	MOSU1F	0.593	-19.734	15.603	-21.1836	15.4481	0.615851	2.92002
Catfish	2	980	5.2	Muscle	MOSU2M	0.622	-23.0738	16.0074	-23.0738	16.0074	0.433578	3.08454
Catfish	2			Plasma	MOSU2P	0.727	-22.6038	15.5794	-23.1074	14.7972	0.430342	2.72858
Catfish	2			Blood	MOSU2B	0.765	-22.5376	15.9368	-23.0431	15.6895	0.436536	2.99103
Catfish	2			Fin	MOSU2F	0.629	-21.4103	16.4299	-22.8599	16.275	0.454202	3.16322
Catfish	3	920	4.5	Muscle	MOSU3M	0.661	-22.7885	16.5988	-22.7885	16.5988	0.461086	3.25848
Catfish	3			Plasma	MOSU3P	0.714	-22.0697	18.2554	-22.5732	17.4732	0.481849	3.51565
Catfish	3			Blood	MOSU3B	0.621	-22.075	17.5553	-22.5805	17.3081	0.481148	3.46708
Catfish	3			Fin	MOSU3F	0.718	-20.6509	17.7341	-22.1006	17.5792	0.527428	3.54681
Catfish	4	800	4.08	Muscle	MOSU4M	0.752	-21.577	17.1685	-21.577	17.1685	0.577918	3.42604
Catfish	4			Plasma	MOSU4P	0.631	-20.7792	16.6097	-21.2828	15.8275	0.606291	3.03162
Catfish	4			Blood	MOSU4B	0.706	-20.5584	16.8188	-21.064	16.5715	0.62739	3.25045
Catfish	4			Fin	MOSU4F	0.568	-20.1374	16.2319	-21.5871	16.077	0.576944	3.105
Catfish	5	820	2.4	Muscle	MOSU5M	0.597	-21.9342	14.7555	-21.9342	14.7555	0.543471	2.71631
Catfish	5			Plasma	MOSU5P	0.564	-21.8023	16.1007	-22.3059	15.3185	0.507627	2.88191
Catfish	5			Blood	MOSU5B	0.586	-21.031	16.1185	-21.5365	15.8713	0.581821	3.04449
Catfish	5			Fin	MOSU5F	0.701	-21.0922	14.9769	-22.5419	14.822	0.484869	2.73588
Catfish	6	870	4.3	Muscle	MOSU6M	0.615	-24.4407	15.6532	-24.4407	15.6532	0.30176	2.98034
Catfish	6			Plasma	MOSU6P	0.559	-25.9713	16.824	-26.4748	16.0418	0.105609	3.09465
Catfish	6			Blood	MOSU6B	0.573	-24.3018	15.9422	-24.8074	15.6949	0.266407	2.99261
Catfish	6			Fin	MOSU6F	0.532	-23.192	15.7085	-24.6417	15.5536	0.282383	2.95105
Catfish	7	900	3.4	Muscle	MOSU7M	0.721	-22.4937	14.7697	-22.4937	14.7697	0.489514	2.72049
Catfish	7			Plasma	MOSU7P	0.667	-21.5933	16.9301	-22.0969	16.1479	0.527786	3.12587
Catfish	7			Blood	MOSU7B	0.678	-21.9393	15.7398	-22.4448	15.4925	0.494231	2.9331
Catfish	7			Fin	MOSU7F	0.635	-21.2778	15.6887	-22.7275	15.5338	0.466972	2.94523
Catfish	8	920	4.46	Muscle	MOSU8M	0.744	-23.989	15.311	-23.989	15.311	0.345323	2.87971
Catfish	8			Plasma	MOSU8P	0.744	-22.5594	15.7393	-23.063	14.9571	0.434619	2.77561
Catfish	8			Blood	MOSU8B	0.523	-23.4099	14.9073	-23.9155	14.66	0.352414	2.68824
Catfish	8			Fin	MOSU8F	0.672	-22.0804	15.395	-23.5301	15.2401	0.389574	2.85886
Catfish	9	850	3.75	Muscle	MOSU9M	0.546	-23.523	15.8146	-23.523	15.8146	0.390256	3.02783
Catfish	9			Plasma	MOSU9P	0.606	-22.5866	17.4709	-23.0901	16.6887	0.432004	3.2849
Catfish	9			Blood	MOSU9B	0.755	-22.4683	16.2317	-22.9738	15.9844	0.443219	3.07777
Catfish	9			Fin	MOSU9F	0.637	-22.278	16.2915	-23.7277	16.1366	0.370521	3.12254
Catfish	10	930	5.25	Muscle	MOSU10M	0.576	-22.9821	17.0911	-22.9821	17.0911	0.442421	3.40326
Catfish	10			Plasma	MOSU10P	0.618	-22.2125	17.4992	-22.7161	16.717	0.468071	3.29324
Catfish	10			Blood	MOSU10B	0.682	-22.3008	17.2726	-22.8063	17.0253	0.459372	3.38391
Catfish	10			Fin	MOSU10F	0.709	-21.5098	17.2335	-22.9594	17.0786	0.444605	3.39959
Catfish	11	1380	14.5	Muscle	MOSU11M	0.755	-23.4562	17.2806	-23.4562	17.2806	0.396701	3.45901
Catfish	11			Plasma	MOSU11P	0.566	-24.6644	18.29	-25.168	17.5078	0.231634	3.52581
Catfish	11			Blood	MOSU11B	0.74	-23.704	17.854	-24.2095	17.6067	0.324058	3.55491
Catfish	11			Fin	MOSU11F	0.667	-22.0073	17.6529	-23.4569	17.498	0.396631	3.52294
Catfish	12	1050	6.1	Muscle	MOSU12M	0.552	-23.6896	17.2361	-23.6896	17.2361	0.374191	3.4459
Catfish	12			Plasma	MOSU12P	0.651	-24.2998	18.1817	-24.8033	17.3995	0.266797	3.49397
Catfish	12			Blood	MOSU12B	0.656	-23.5103	17.9656	-24.0158	17.7183	0.342737	3.58773
Catfish	12			Fin	MOSU12F	0.574	-22.0299	17.742	-23.4795	17.5871	0.394453	3.54915
Catfish	13	840	3.6	Muscle	MOSU13M	0.522	-23.147	16.8067	-23.147	16.8067	0.426517	3.31963
Catfish	13			Plasma	MOSU13P	0.571	-25.4852	17.4412	-25.9888	16.659	0.152479	3.27618
Catfish	13			Blood	MOSU13B	0.684	-23.5744	17.4685	-24.08	17.2213	0.336552	3.44155
Catfish	13			Fin	MOSU13F	0.616	-22.6228	17.645	-24.0725	17.4901	0.337271	3.52063
Catfish	14	800	3.16	Muscle	MOSU14M	0.615	-22.845	15.9687	-22.845	15.9687	0.455642	3.07315
Catfish	14			Plasma	MOSU14P	0.563	-21.5529	16.9307	-22.0565	16.1485	0.531682	3.12602
Catfish	14			Blood	MOSU14B	0.75	-21.4705	15.8954	-21.976	15.6481	0.539438	2.97885
Catfish	14			Fin	MOSU14F	0.553	-20.7509	16.0579	-22.2005	15.903	0.517789	3.05383
Catfish	15	840	3.3	Muscle	MOSU15M	0.703	-21.5947	16.0102	-21.5947	16.0102	0.576211	3.08535
Catfish	15			Plasma	MOSU15P	0.55	-21.3015	16.9328	-21.8051	16.1506	0.555925	3.12665
Catfish	15			Blood	MOSU15B	0.717	-20.5367	16.7448	-21.0422	16.4975	0.629488	3.22868
Catfish	15			Fin	MOSU15F	0.569	-19.8072	16.5798	-21.2569	16.4249	0.608783	3.20732
Catfish	19	1060	8.3	Muscle	MOSU19M	0.523	-23.5927	14.7311	-23.5927	14.7311	0.383535	2.70915
Catfish	19			Plasma	MOSU19P	0.636	-26.9712	15.4165	-27.4748	14.6343	0.00918176	2.68067
Catfish	19			Blood	MOSU19B	0.681	-23.9987	14.9123	-24.5042	14.665	0.295637	2.6897
Catfish	19			Fin	MOSU19F	0.729	-22.833	14.9149	-24.2827	14.76	0.317	2.71765
Pike	1	740	4.5	Muscle	MOST1M	0.648	-19.0464	15.7043	-19.0464	15.7043	0.821946	2.99538
Pike	1			Plasma	MOST1P	0.713	-20.861	16.8246	-19.7879	16.0449	0.750441	3.09555
Pike	1			Blood	MOST1B	0.697	-19.5658	16.3397	-19.3023	15.8341	0.797269	3.03357
Pike	1			Fin	MOST1F	0.594	-19.1883	16.5322	-19.752	16.1543	0.753903	3.12775
Pike	2	920	7.5	Muscle	MOST2M	0.562	-22.5399	17.757	-22.5399	17.757	0.485066	3.59911
Pike	2			Plasma	MOST2P	0.621	-23.1483	18.0391	-22.0752	17.2593	0.529879	3.45274
Pike	2			Blood	MOST2B	0.608	-22.111	17.7751	-21.8476	17.2695	0.551823	3.45574
Pike	2			Fin	MOST2F	0.563	-21.0118	18.0037	-21.5756	17.6258	0.578057	3.56053
Pike	3	760	4.6	Muscle	MOST3M	0.598	-20.31	16.4157	-20.31	16.4157	0.700093	3.20462
Pike	3			Plasma	MOST3P	0.553	-21.2437	17.3248	-20.1706	16.5451	0.713541	3.24266
Pike	3			Blood	MOST3B	0.749	-20.4505	17.0798	-20.1871	16.5742	0.711948	3.25124
Pike	3			Fin	MOST3F	0.763	-19.9611	16.9741	-20.5248	16.5963	0.679378	3.25772
Pike	4	600	3	Muscle	MOST4M	0.682	-19.8331	15.8005	-19.8331	15.8005	0.746083	3.02369
Pike	4			Plasma	MOST4P	0.722	-21.2259	15.7359	-20.1528	14.9562	0.715253	2.77534
Pike	4			Blood	MOST4B	0.746	-20.3955	16.1158	-20.132	15.6103	0.717258	2.96773
Pike	4			Fin	MOST4F	0.728	-19.5805	15.5907	-20.1442	15.2128	0.71608	2.85084
Pike	5	880	7.1	Muscle	MOST5M	0.703	-20.8911	17.068	-20.8911	17.068	0.644064	3.39646
Pike	5			Plasma	MOST5P	0.708	-23.3286	18.0043	-22.2555	17.2245	0.512488	3.4425
Pike	5			Blood	MOST5B	0.583	-22.1929	17.5402	-21.9295	17.0346	0.543929	3.38665
Pike	5			Fin	MOST5F	0.7	-21.4564	17.3442	-22.0201	16.9664	0.535187	3.36658
Pike	6	860	6.9	Muscle	MOST6M	0.601	-22.2922	17.4828	-22.2922	17.4828	0.508945	3.51848
Pike	6			Plasma	MOST6P	0.606	-22.1162	17.6699	-21.0431	16.8901	0.629403	3.34415
Pike	6			Blood	MOST6B	0.547	-21.9765	18.0066	-21.713	17.5011	0.5648	3.52385
Pike	6			Fin	MOST6F	0.601	-20.5922	17.7557	-21.1559	17.3779	0.618524	3.48761
Pike	7	840	6.2	Muscle	MOST7M	0.686	-24.1547	17.9053	-24.1547	17.9053	0.329345	3.64275
Pike	7			Plasma	MOST7P	0.58	-24.7851	18.2487	-23.712	17.4689	0.372035	3.51438
Pike	7			Blood	MOST7B	0.629	-24.1708	18.6104	-24.5217	17.7431	0.293956	3.59503
Pike	7			Fin	MOST7F	0.66	-23.2088	18.3248	-23.7726	17.947	0.366192	3.65499
Pike	8	450	0.6	Muscle	MOST8M	0.703	-19.9902	15.5397	-19.9902	15.5397	0.730931	2.94698
Pike	8			Plasma	MOST8P	0.729	-20.4978	16.3187	-19.4247	15.539	0.785465	2.94675
Pike	8			Blood	MOST8B??	0.6	-19.9847	15.5267	-19.7212	15.0211	0.756872	2.79445
Pike	8			Fin	MOST8F	0.675	-19.2712	15.9287	-19.835	15.5508	0.745904	2.95024
Pike	9	850	6.3	Muscle	MOST9M	0.713	-20.0676	17.194	-20.0676	17.194	0.723474	3.43352
Pike	9			Plasma	MOST9P	0.638	-20.8586	17.8777	-19.7855	17.098	0.75068	3.40528
Pike	9			Blood	MOST9B	0.755	-20.1215	17.6349	-19.8581	17.1293	0.743673	3.4145
Pike	9			Fin	MOST9F	0.703	-19.0474	17.4463	-19.6111	17.0684	0.767488	3.39659
Pike	10	720	4.3	Muscle	MOST10M	0.671	-20.3146	17.0177	-20.3146	17.0177	0.699649	3.38166
Pike	10			Plasma	MOST10P	0.725	-20.2242	17.6566	-19.1511	16.8769	0.811852	3.34025
Pike	10			Blood	MOST10B	0.755	-19.9459	17.074	-19.6825	16.5685	0.760607	3.24956
Pike	10			Fin	MOST10F	0.601	-18.5843	17.1229	-19.148	16.745	0.812147	3.30148
Pike	11	700	4	Muscle	MOST11M	0.663	-19.2533	15.8994	-19.2533	15.8994	0.802	3.05277
Pike	11			Plasma	MOST11P	0.591	-20.4563	16.9609	-19.3831	16.1811	0.789475	3.13563
Pike	11			Blood	MOST11B	0.57	-19.5024	16.1979	-19.239	15.6924	0.803374	2.99187
Pike	11			Fin	MOST11F	0.63	-18.3126	16.7461	-18.8763	16.3683	0.838349	3.19067
Pike	12	595	1.4	Muscle	MOST12M	0.639	-20.632	16.8156	-20.632	16.8156	0.669044	3.32222
Pike	12			Plasma	MOST12P	0.747	-22.3388	17.5989	-21.2657	16.8192	0.607938	3.32328
Pike	12			Blood	MOST12B	0.669	-20.8575	17.8955	-20.5941	17.39	0.672705	3.49117
Pike	12			Fin	MOST12F	0.585	-20.2298	17.0438	-20.7935	16.6659	0.653467	3.27821
Perch	1	370	0.66	Muscle	MOOK1M	0.648	-23.744	16.4321	-23.744	16.4321	0.368944	3.20944
Perch	1			Plasma	MOOK1P	0.568	-26.3131	16.218	-23.9349	17.0132	0.350538	3.38036
Perch	1			Blood	MOOK1B	0.707	-25.099	16.043	-24.1006	16.8148	0.33456	3.32199
Perch	1			Fin	MOOK1F	0.677	-23.8157	16.7429	-23.7164	16.5773	0.371614	3.25214
Perch	2	360	0.59	Muscle	MOOK2M	0.567	-24.3512	16.0506	-24.3512	16.0506	0.310394	3.09724
Perch	2			Plasma	MOOK2P	0.698	-26.5111	15.2447	-24.1328	16.0399	0.331451	3.0941
Perch	2			Blood	MOOK2B	0.664	-25.2518	15.3657	-24.2534	16.1375	0.31983	3.12279
Perch	2			Fin	MOOK2F	0.745	-24.2087	16.5016	-24.1093	16.336	0.333722	3.18116
Perch	3	450	1.9	Muscle	MOOK3M	0.719	-20.532	17.6378	-20.532	17.6378	0.678692	3.56406
Perch	3			Plasma	MOOK3P	0.539	-21.8905	16.0495	-19.5123	16.8447	0.777024	3.33079
Perch	3			Blood	MOOK3B	0.628	-20.7834	16.8894	-19.785	17.6611	0.750724	3.57093
Perch	3			Fin	MOOK3F	0.571	-19.2394	17.6515	-19.1401	17.4858	0.812917	3.51935
Perch	4	390	0.88	Muscle	MOOK4M	0.691	-20.8483	17.2484	-20.8483	17.2484	0.648184	3.44952
Perch	4			Plasma	MOOK4P	0.758	-22.0139	16.2615	-19.6357	17.0567	0.765124	3.39315
Perch	4			Blood	MOOK4B	0.665	-21.4355	16.5905	-20.4371	17.3623	0.687842	3.48302
Perch	4			Fin	MOOK4F	0.705	-19.4708	17.9356	-19.3715	17.77	0.790601	3.60293
Perch	5	270	0.26	Muscle	MOOK5M	0.73	-20.5993	15.682	-20.5993	15.682	0.672201	2.98883
Perch	5			Plasma	MOOK5P	0.766	-23.2338	16.4217	-20.8556	17.2169	0.647486	3.44028
Perch	5			Blood	MOOK5B	0.739	-22.8344	14.6599	-21.8359	15.4316	0.552946	2.91519
Perch	5			Fin	MOOK5F	0.632	-21.311	16.3044	-21.2117	16.1387	0.613147	3.12316
Perch	6	250	0.2	Muscle	MOOK6M	0.684	-20.7734	16.8866	-20.7734	16.8866	0.655412	3.34311
Perch	6			Plasma	MOSU6P	0.559	-22.2669	15.2615	-19.8887	16.0567	0.740726	3.09903
Perch	6			Blood	MOOK6B	0.67	-22.4259	16.0635	-21.4275	16.8352	0.592333	3.32801
Perch	6			Fin	MOOK6F	0.568	-21.6138	17.402	-21.5144	17.2363	0.583951	3.44597
Perch	7	390	0.87	Muscle	MOOK7M	0.668	-22.5249	16.7979	-22.5249	16.7979	0.48651	3.31704
Perch	7			Plasma	MOSU7P	0.667	-25.3131	15.218	-22.9349	16.0132	0.44697	3.08624
Perch	7			Blood	MOOK7B	0.707	-22.8767	16.0622	-21.8783	16.8339	0.548866	3.32762
Perch	7			Fin	MOOK7F	0.704	-21.2473	17.2826	-21.1479	17.117	0.619293	3.41087
Perch	8	275	0.27	Muscle	MOOK8M	0.749	-19.5785	16.2209	-19.5785	16.2209	0.770635	3.14733
Perch	8			Plasma	MOOK8P	0.572	-22.9619	15.5033	-20.5836	16.2985	0.673709	3.17016
Perch	8			Blood	MOOK8B	0.667	-20.3989	15.4491	-19.4005	16.2209	0.787803	3.14732
Perch	8			Fin	MOOK8F	0.671	-19.218	16.1664	-19.1186	16.0008	0.814983	3.08258
Perch	9	310	0.41	Muscle	MOOK9M	0.592	-20.9288	17.0096	-20.9288	17.0096	0.640422	3.37931
Perch	9			Plasma	MOOK9P	0.735	-23.8278	15.7376	-21.4496	16.5328	0.590201	3.23906
Perch	9			Blood	MOOK9B	0.67	-21.826	16.191	-20.8276	16.9627	0.650184	3.36551
Perch	9			Fin	MOOK9F	0.719	-20.8162	17.1419	-20.7168	16.9763	0.660865	3.36949
Perch	10	260	0.23	Muscle	MOOK10M	0.626	-19.4819	16.5546	-19.4819	16.5546	0.779951	3.24546
Perch	10			Plasma	MOOK10P	0.682	-23.0261	15.5181	-20.6479	16.3134	0.667514	3.17452
Perch	10			Blood	MOOK10B	0.729	-20.6313	15.6502	-19.696	16.3841	0.759303	3.19532
Perch	10			Fin	MOOK10F	0.624	-19.9054	16.7359	-19.806	16.5703	0.748697	3.25008
Perch	11	290	0.44	Muscle	MOOK11M	0.716	-21.1911	16.593	-21.1911	16.593	0.615127	3.25676
Perch	11			Plasma	MOOK11P	0.734	-24.1999	15.3189	-21.8217	16.1141	0.554321	3.11591
Perch	11			Blood	MOOK11B	0.687	-21.9941	15.583	-21.1072	16.3213	0.623218	3.17686
Perch	11			Fin	MOOK11F	0.628	-21.7617	16.047	-21.6624	15.8814	0.569684	3.04746
Perch	12	275	0.27	Muscle	MOOK12M	0.746	-20.9527	17.2944	-20.9527	17.2944	0.638122	3.46305
Perch	12			Plasma	MOOK12P	0.735	-24.051	16.6832	-21.6728	17.4784	0.568679	3.51719
Perch	12			Blood	MOOK12B	0.718	-22.4061	16.5656	-21.4077	17.3373	0.594243	3.47569
Perch	12			Fin	MOOK12F	0.561	-22.1704	17.5154	-22.0711	17.3497	0.530274	3.47932
Perch	12	275	0.27	Muscle	MOOK13M	0.616	-20.1003	15.7098	-20.1003	15.7098	0.720319	2.99699
Perch	12			Plasma	MOOK13P	0.555	-21.3663	15.0031	-18.9881	15.7983	0.827572	3.02303
Perch	12			Blood	MOOK13B	0.746	-20.7388	15.0871	-19.7404	15.8588	0.755028	3.04084
Perch	12			Fin	MOOK13F	0.77	-19.333	15.7468	-21.7112	14.9516	0.564972	2.77399
Perch	14	275	0.27	Muscle	MOOK14M	0.677	-20.1078	15.8488	-20.1078	15.8488	0.719598	3.03789
Perch	14			Plasma	MOOK14P	0.551	-22.5233	15.7183	-20.1451	16.5135	0.716002	3.23339
Perch	14			Blood	MOOK14B	0.675	-20.9006	15.3401	-19.9022	16.1119	0.739425	3.11525
Perch	14			Fin	MOOK14F	0.692	-19.905	15.9401	-19.8056	15.7745	0.748735	3.01602
Perch	15	240	0.18	Muscle	MOOK15M	0.684	-18.8953	15.0235	-18.8953	15.0235	0.83652	2.79515
Perch	15			Plasma	MOOK15P	0.614	-20.1864	15.5989	-17.8082	16.3941	0.941354	3.19827
Perch	15			Blood	MOOK15B	0.52	-19.6442	15.4727	-18.6457	16.2444	0.860584	3.15423
Perch	15			Fin	MOOK15F	0.638	-18.4839	15.7178	-18.3845	15.5522	0.885774	2.95064
Rudd	1	365	0.81	Muscle	MOPE1M	0.526	-16.7868	13.4718	-16.7868	13.4718	1.03984	2.33878
Rudd	1			Plasma	MOPE1P	0.731	-17.0277	12.111	-14.8968	13.0164	1.22211	2.20484
Rudd	1			Blood	MOPE1B	0.696	-16.3839	12.1719	-16.0466	13.0005	1.11123	2.20013
Rudd	1			Fin	MOPE1F	0.62	-14.7779	11.9716	-15.0992	13.301	1.20259	2.28852
Rudd	2	275	0.32	Muscle	MOPE2M	0.77	-20.9671	14.127	-20.9671	14.127	0.636728	2.53146
Rudd	2			Plasma	MOPE2P	0.595	-23.1978	14.4519	-21.0668	15.3573	0.627113	2.89333
Rudd	2			Blood	MOPE2B	0.717	-19.8461	13.6127	-19.5088	14.4413	0.777359	2.6239
Rudd	2			Fin	MOPE2F	0.635	-19.8312	13.894	-20.1524	15.2234	0.715298	2.85393
Rudd	3	250	0.24	Muscle	MOPE3M	0.746	-17.2869	12.6706	-17.2869	12.6706	0.991623	2.10311
Rudd	3			Plasma	MOPE3P	0.614	-19.2467	11.2836	-17.1157	12.189	1.00813	1.96148
Rudd	3			Blood	MOPE3B	0.761	-17.5623	11.6691	-17.225	12.4976	0.997592	2.05223
Rudd	3			Fin	MOPE3F	0.769	-17.0778	11.306	-17.399	12.6354	0.980808	2.09277
Rudd	4	330	0.65	Muscle	MOPE4M	0.643	-15.5977	12.5721	-15.5977	12.5721	1.15451	2.07416
Rudd	4			Plasma	MOPE4P	0.524	-17.6726	11.8673	-15.5416	12.7727	1.15992	2.13314
Rudd	4			Blood	MOPE4B	0.524	-16.5439	12.2689	-16.2066	13.0975	1.0958	2.22866
Rudd	4			Fin	MOPE4F	0.651	-15.2858	11.8391	-15.607	13.1685	1.15361	2.24956
Rudd	5	270	0.25	Muscle	MOPE5M	0.667	-15.351	12.5076	-15.351	12.5076	1.1783	2.05519
Rudd	5			Plasma	MOPE5P	0.767	-17.9604	12.0713	-15.8294	12.9767	1.13217	2.19315
Rudd	5			Blood	MOPE5B	0.714	-16.1275	12.1069	-15.7902	12.9354	1.13595	2.181
Rudd	5			Fin	MOPE5F	0.718	-15.5325	11.7193	-15.8537	13.0487	1.12983	2.21432
Rudd	6	270	0.25	Muscle	MOPE6M	0.734	-16.3114	12.9314	-16.3114	12.9314	1.08569	2.17983
Rudd	6			Plasma	MOPE6P	0.686	-18.2562	12.1457	-16.1252	13.0511	1.10364	2.21503
Rudd	6			Blood	MOPE6B	0.66	-16.1883	12.5203	-15.8509	13.3488	1.1301	2.30259
Rudd	6			Fin	MOPE6F	0.636	-15.7646	11.79	-16.0858	13.1194	1.10744	2.23512
Rudd	7	270	0.25	Muscle	MOPE7M	0.612	-15.6193	13.7877	-15.6193	13.7877	1.15243	2.43169
Rudd	7			Plasma	MOPE7P	0.552	-17.0002	13.5651	-14.8693	14.4705	1.22476	2.6325
Rudd	7			Blood	MOPE7B	0.614	-15.4897	12.7896	-15.1524	13.6181	1.19746	2.3818
Rudd	7			Fin	MOPE7F	0.734	-14.7689	12.4776	-15.0901	13.807	1.20347	2.43734
Rudd	8	240	0.2	Muscle	MOPE8M	0.634	-15.2423	13.9712	-15.2423	13.9712	1.18878	2.48563
Rudd	8			Plasma	MOPE8P	0.686	-17.279	12.6744	-15.148	13.5798	1.19787	2.37053
Rudd	8			Blood	MOPE8B	0.636	-15.7106	12.5132	-15.3732	13.3418	1.17616	2.30052
Rudd	8			Fin	MOPE8F	0.731	-14.8871	12.2016	-15.2083	13.531	1.19206	2.35618
Rudd	9	225	0.16	Muscle	MOPE9M	0.566	-15.6895	14.1078	-15.6895	14.1078	1.14566	2.52582
Rudd	9			Plasma	MOPE9P	0.608	-17.9315	13.1263	-15.8006	14.0317	1.13495	2.50343
Rudd	9			Blood	MOPE9B	0.671	-16.1466	12.9521	-15.8093	13.7807	1.13411	2.42961
Rudd	9			Fin	MOPE9F	0.655	-15.5604	12.1769	-15.8816	13.5063	1.12713	2.3489
Rudd	10	225	0.16	Muscle	MOPE10M	0.726	-16.0137	13.3994	-16.0137	13.3994	1.1144	2.31748
Rudd	10			Plasma	MOPE10P	0.759	-16.5997	12.1799	-14.4687	13.0853	1.26338	2.22509
Rudd	10			Blood	MOPE10B	0.606	-16.2351	12.2982	-15.8977	13.1268	1.12558	2.23728
Rudd	10			Fin	MOPE10F	0.677	-14.7423	11.8795	-15.0635	13.2089	1.20602	2.26145
Rudd	11	290	0.44	Muscle	MOPE11M	0.734	-15.6793	12.9463	-15.6793	12.9463	1.14665	2.1842
Rudd	11			Plasma	MOPE11P	0.666	-17.2407	13.0678	-15.1098	13.9732	1.20156	2.48624
Rudd	11			Blood	MOPE11B	0.615	-16.021	12.7396	-15.6836	13.5681	1.14623	2.3671
Rudd	11			Fin	MOPE11F	0.673	-15.3437	12.1014	-15.6649	13.4308	1.14803	2.3267
Rudd	12	250	0.24	Muscle	MOPE12M	0.751	-15.4514	13.3259	-15.4514	13.3259	1.16862	2.29587
Rudd	12			Plasma	MOPE12P	0.589	-18.5724	12.5676	-16.4414	13.473	1.07315	2.33912
Rudd	12			Blood	MOPE12B	0.628	-15.8929	12.2994	-15.5555	13.1279	1.15858	2.23762
Rudd	12			Fin	MOPE12F	0.594	-15.546	11.8352	-15.8673	13.1646	1.12852	2.24842
Rudd	13	250	0.24	Muscle	MOPE13M	0.739	-15.8905	12.7695	-15.8905	12.7695	1.12628	2.13222
Rudd	13			Plasma	MOPE13P	0.743	-18.7942	11.6147	-16.6632	12.5201	1.05177	2.05885
Rudd	13			Blood	MOPE13B	0.661	-16.2856	11.9447	-15.9483	12.7733	1.12071	2.13331
Rudd	13			Fin	MOPE13F	0.528	-16.2679	11.2722	-16.5891	12.6016	1.05891	2.08283
Rudd	14	240	0.2	Muscle	MOPE14M	0.735	-16.3458	13.467	-16.3458	13.467	1.08237	2.33736
Rudd	14			Plasma	MOPE14P	0.639	-19.068	11.981	-16.937	12.8864	1.02536	2.16658
Rudd	14			Blood	MOPE14B	0.748	-17.0343	12.4317	-16.6969	13.2603	1.04851	2.27655
Rudd	14			Fin	MOPE14F	0.678	-16.6364	11.7957	-16.9577	13.1251	1.02337	2.23678
Rudd	15	230	0.22	Muscle	MOPE15M	0.591	-16.7973	12.9764	-16.7973	12.9764	1.03883	2.19305
Rudd	15			Plasma	MOPE15P	0.761	-19.5962	12.4305	-17.4653	13.3359	0.974419	2.29879
Rudd	15			Blood	MOPE15B	0.695	-17.7127	12.3868	-17.3753	13.2153	0.983095	2.26332
Rudd	15			Fin	MOPE15F	0.695	-17.1213	11.5954	-17.4425	12.9248	0.976616	2.17787

## Sheet: Milada
Species	Individual	TL [mm]	W [kg]	Tissue	Identifier	Amount	d13C Primary data	d15N Primary data	d13C After centering	d15N After centering	d13Ccorr After normalization	TP d15N After normalization
Catfish	1	1310	12.3	Muscle	MISU1M	0.679	-22.2666	27.3433	-22.2666	27.3433	0.392571	3.21863
Catfish	1			Plasma	MISU1P	0.758	-21.8588	28.9015	-21.5509	27.6259	0.555613	3.30175
Catfish	1			Blood	MISU1B	0.672	-21.5372	28.1618	-22.1152	26.9172	0.427055	3.09329
Catfish	1			Fin	MISU1F	0.653	-20.9342	28.3107	-22.2296	27.6173	0.400995	3.2992
Catfish	2	1280	12.1	Muscle	MISU2M	0.529	-23.0763	27.6158	-23.0763	27.6158	0.208125	3.29877
Catfish	2			Plasma	MISU2P	0.562	-23.9784	29.3824	-23.6704	28.1068	0.0727907	3.44319
Catfish	2			Blood	MISU2B	0.747	-22.6728	29.4646	-23.2508	28.22	0.168373	3.47647
Catfish	2			Fin	MISU2F	0.526	-21.7021	28.6086	-22.9976	27.9151	0.226064	3.38681
Catfish	3	1180	10.1	Muscle	MISU3M	0.615	-22.7378	27.1313	-22.7378	27.1313	0.285243	3.15626
Catfish	3			Plasma	MISU3P	0.7	-22.69	28.7678	-22.3821	27.4922	0.366258	3.26242
Catfish	3			Blood	MISU3B	0.76	-21.8713	28.319	-22.4493	27.0744	0.350953	3.13953
Catfish	3			Fin	MISU3F	0.758	-21.2061	27.8088	-22.5016	27.1154	0.339051	3.15158
Catfish	4	840	4	Muscle	MISU4M	0.631	-23.6696	24.7865	-23.6696	24.7865	0.0729944	2.46663
Catfish	4			Plasma	MISU4P	0.672	-23.2948	28.3427	-22.9869	27.0671	0.228499	3.13739
Catfish	4			Blood	MISU4B	0.734	-22.8915	26.4899	-23.4695	25.2453	0.118575	2.60156
Catfish	4			Fin	MISU4F	0.555	-22.3448	26.8799	-23.6403	26.1865	0.0796689	2.87838
Catfish	5	880	4.5	Muscle	MISU5M	0.626	-21.9585	28.1298	-21.9585	28.1298	0.462757	3.44994
Catfish	5			Plasma	MISU5P	0.626	-21.7908	28.435	-21.4829	27.1595	0.571088	3.16455
Catfish	5			Blood	MISU5B	0.538	-21.7205	28.6311	-22.2985	27.3865	0.385314	3.23133
Catfish	5			Fin	MISU5F	0.729	-21.0682	27.6675	-22.3636	26.974	0.370476	3.11001
Catfish	6	1150	10.2	Muscle	MISU6M	0.622	-22.5112	27.4457	-22.5112	27.4457	0.336854	3.24874
Catfish	6			Plasma	MISU6P	0.744	-23.2552	29.3459	-22.9473	28.0703	0.237525	3.43245
Catfish	6			Blood	MISU6B	0.634	-22.5782	29.4651	-23.1562	28.2205	0.189928	3.47661
Catfish	6			Fin	MISU6F	0.702	-21.8972	28.2203	-23.1927	27.5269	0.181624	3.2726
Catfish	7	820	3.8	Muscle	MISU7M	0.736	-21.6508	27.6468	-21.6508	27.6468	0.532841	3.30787
Catfish	7			Plasma	MISU7P	0.707	-22.7715	29.2552	-22.4636	27.9796	0.347693	3.40577
Catfish	7			Blood	MISU7B	0.622	-20.7688	28.914	-21.3468	27.6694	0.602099	3.31453
Catfish	7			Fin	MISU7F	0.694	-20.3021	28.1724	-21.5976	27.479	0.544973	3.25854
Catfish	8	970	6.7	Muscle	MISU8M	0.52	-22.8665	26.4078	-22.8665	26.4078	0.255929	2.94348
Catfish	8			Plasma	MISU8P	0.77	-23.1946	28.0888	-22.8867	26.8133	0.251316	3.06272
Catfish	8			Blood	MISU8B	0.522	-22.5256	27.862	-23.1036	26.6174	0.20192	3.00512
Catfish	8			Fin	MISU8F	0.746	-21.3722	27.5739	-22.6677	26.8805	0.30121	3.0825
Catfish	9	680	2	Muscle	MISU9M	0.672	-20.6372	27.3122	-20.6372	27.3122	0.763736	3.20947
Catfish	9			Plasma	MISU9P	0.622	-21.6468	28.6367	-21.3389	27.3611	0.603886	3.22385
Catfish	9			Blood	MISU9B	0.69	-21.4098	28.9574	-21.9878	27.7128	0.456085	3.3273
Catfish	9			Fin	MISU9F	0.739	-20.8342	28.2082	-22.1297	27.5147	0.423762	3.26904
Catfish	10	100	6.4	Muscle	MISU10M	0.596	-22.3401	27.0008	-22.3401	27.0008	0.375824	3.11789
Catfish	10			Plasma	MISU10P	0.731	-22.2234	28.4558	-21.9155	27.1803	0.472556	3.17066
Catfish	10			Blood	MISU10B	0.544	-21.3925	28.3474	-21.9705	27.1028	0.460014	3.14787
Catfish	10			Fin	MISU10F	0.721	-20.2411	27.9693	-21.5365	27.2759	0.558881	3.1988
Catfish	11	960	5.5	Muscle	MISU11M	0.691	-23.2291	27.8212	-23.2291	27.8212	0.173323	3.35917
Catfish	11			Plasma	MISU11P	0.601	-23.7713	28.4437	-23.4634	27.1682	0.119961	3.16711
Catfish	11			Blood	MISU11B	0.633	-22.8843	28.9667	-23.4623	27.7221	0.120202	3.33004
Catfish	11			Fin	MISU11F	0.711	-22.3596	28.0577	-23.6551	27.3643	0.0762943	3.22478
Catfish	12	1320	13.8	Muscle	MISU12M	0.593	-23.4503	26.7746	-23.4503	26.7746	0.122932	3.05134
Catfish	12			Plasma	MISU12P	0.679	-24.6788	29.3861	-24.3709	28.1105	-0.0867669	3.44427
Catfish	12			Blood	MISU12B	0.775	-23.2118	28.5065	-23.7898	27.2619	0.0455953	3.19467
Catfish	12			Fin	MISU12F	0.695	-22.6332	28.5594	-23.9286	27.866	0.0139779	3.37234
Catfish	13	1280	13	Muscle	MISU13M	0.766	-21.8985	27.3905	-21.8985	27.3905	0.476422	3.2325
Catfish	13			Plasma	MISU13P	0.672	-22.0111	28.2507	-21.7032	26.9751	0.520913	3.11033
Catfish	13			Blood	MISU13B	0.557	-21.3779	27.9819	-21.9559	26.7373	0.463351	3.04038
Catfish	13			Fin	MISU13F	0.687	-20.2543	27.9013	-21.5498	27.2079	0.555857	3.1788
Catfish	14	1000	6.7	Muscle	MISU14M	0.549	-21.4576	27.8537	-21.4576	27.8537	0.576856	3.36874
Catfish	14			Plasma	MISU14P	0.754	-22.7187	28.5566	-22.4107	27.2811	0.359739	3.20031
Catfish	14			Blood	MISU14B	0.694	-21.1566	29.2348	-21.7346	27.9902	0.513751	3.40887
Catfish	14			Fin	MISU14F	0.606	-20.6103	28.35	-21.9057	27.6565	0.474779	3.31074
Catfish	15	960	5.9	Muscle	MISU15M	0.562	-22.4398	28.7362	-22.4398	28.7362	0.353126	3.6283
Catfish	15			Plasma	MISU15P	0.623	-23.9446	29.0479	-23.6367	27.7723	0.0804705	3.3448
Catfish	15			Blood	MISU15B	0.539	-22.461	29.6646	-23.039	28.42	0.216623	3.5353
Catfish	15			Fin	MISU15F	0.588	-21.6905	28.4474	-22.986	27.754	0.228707	3.33941
Catfish	16	1140	8.9	Muscle	MISU16M	0.62	-23.0203	27.7659	-23.0203	27.7659	0.220884	3.34293
Catfish	16			Plasma	MISU16P	0.557	-23.0948	28.6924	-22.7869	27.4168	0.274049	3.24024
Catfish	16			Blood	MISU16B	0.733	-22.0522	28.6126	-22.6302	27.368	0.309756	3.22587
Catfish	16			Fin	MISU16F	0.593	-21.6086	28.0053	-22.904	27.3119	0.247371	3.20938
Pike	1	1170	9.6	Muscle	MIST1M	0.6	-23.1627	30.3389	-23.1627	30.3389	0.18846	4.09969
Pike	1			Plasma	MIST1P	0.598	-23.9636	28.9647	-23.6959	28.7468	0.0669956	3.63141
Pike	1			Blood	MIST1B	0.646	-23.5206	29.5784	-23.7201	29.226	0.0614765	3.77236
Pike	1			Fin	MIST1F	0.615	-22.5134	30.739	-23.6463	30.2925	0.0782983	4.08602
Pike	2	800	3.7	Muscle	MIST2M	0.665	-20.3999	28.7361	-20.3999	28.7361	0.817782	3.62827
Pike	2			Plasma	MIST2P	0.664	-20.2771	29.1679	-20.0093	28.9499	0.906756	3.69116
Pike	2			Blood	MIST2B	0.69	-20.0566	29.3267	-20.2561	28.9743	0.850546	3.69834
Pike	2			Fin	MIST2F	0.609	-18.9267	29.3934	-20.0596	28.9468	0.895306	3.69024
Pike	3	860	4.8	Muscle	MIST3M	0.564	-22.3593	29.1968	-22.3593	29.1968	0.371459	3.76376
Pike	3			Plasma	MIST3P	0.534	-22.4915	29.4867	-22.2237	29.2687	0.402335	3.78491
Pike	3			Blood	MIST3B	0.713	-22.3224	29.6865	-22.5219	29.3342	0.334416	3.80417
Pike	3			Fin	MIST3F	0.608	-21.2327	29.9132	-22.3656	29.4667	0.370019	3.84314
Pike	4	950	5.5	Muscle	MIST4M	0.587	-22.7853	29.3091	-22.7853	29.3091	0.274411	3.79681
Pike	4			Plasma	MIST4P	0.711	-23.5436	30.0518	-23.2758	29.8339	0.162681	3.95114
Pike	4			Blood	MIST4B	0.657	-22.7156	30.2963	-22.9151	29.944	0.244843	3.98352
Pike	4			Fin	MIST4F	0.696	-21.9717	30.6564	-23.1046	30.2098	0.201684	4.0617
Pike	5	590	1.5	Muscle	MIST5M	0.699	-23.0603	29.6968	-23.0603	29.6968	0.211778	3.91083
Pike	5			Plasma	MIST5P	0.637	-23.674	30.0168	-23.4063	29.7989	0.132965	3.94085
Pike	5			Blood	MIST5B	0.669	-23.4031	29.7257	-23.6026	29.3734	0.088237	3.8157
Pike	5			Fin	MIST5F	0.613	-22.5149	29.6856	-23.6477	29.239	0.077964	3.77618
Pike	6	550	1.1	Muscle	MIST6M	0.547	-23.3423	29.2336	-23.3423	29.2336	0.14753	3.77458
Pike	6			Plasma	MIST6P	0.57	-23.753	29.7211	-23.4853	29.5032	0.114975	3.85388
Pike	6			Blood	MIST6B	0.691	-23.3783	29.2091	-23.5778	28.8568	0.0938982	3.66376
Pike	6			Fin	MIST6F	0.673	-22.2314	29.0016	-23.3643	28.555	0.142531	3.57501
Pike	7	470	0.7	Muscle	MIST7M	0.741	-22.4284	28.3152	-22.4284	28.3152	0.355723	3.50446
Pike	7			Plasma	MIST7P	0.625	-23.1027	27.5326	-22.835	27.3147	0.263094	3.2102
Pike	7			Blood	MIST7B	0.708	-22.3348	27.6145	-22.5343	27.2622	0.331605	3.19476
Pike	7			Fin	MIST7F	0.65	-21.4208	27.9715	-22.5537	27.5249	0.32718	3.27204
Pike	8	1150	10.6	Muscle	MIST8M	0.707	-20.6543	28.1175	-20.6543	28.1175	0.759847	3.44632
Pike	8			Plasma	MIST8P	0.653	-21.1203	29.3048	-20.8525	29.0868	0.714684	3.73142
Pike	8			Blood	MIST8B	0.58	-20.6302	29.4297	-20.8297	29.0774	0.719879	3.72865
Pike	8			Fin	MIST8F	0.733	-20.0187	29.1162	-21.1516	28.6696	0.646564	3.60871
Pike	9	1070	8.5	Muscle	MIST9M	0.723	-21.5	29.2247	-21.5	29.2247	0.567193	3.77198
Pike	9			Plasma	MIST9P	0.605	-21.2369	28.9465	-20.9692	28.7285	0.688108	3.62604
Pike	9			Blood	MIST9B	0.685	-21.245	28.9392	-21.4445	28.5869	0.579849	3.58438
Pike	9			Fin	MIST9F	0.701	-20.153	28.8448	-21.2859	28.3982	0.615971	3.52888
Pike	10	1060	8.3	Muscle	MIST10M	0.549	-21.8391	28.9668	-21.8391	28.9668	0.489958	3.69613
Pike	10			Plasma	P		-22.3575	28.551	-22.0898	28.3331	0.432857	3.50973
Pike	10			Blood	B		-21.545	28.3922	-21.7445	28.0399	0.511511	3.4235
Pike	10			Fin	MIST10F	0.691	-20.5325	29.3134	-21.6654	28.8669	0.529532	3.66673
Pike	11	950	5.2	Muscle	MIST11M	0.6	-22.323	29.0805	-22.323	29.0805	0.379717	3.72955
Pike	11			Plasma	MIST11P	0.745	-22.1357	28.7551	-21.868	28.5371	0.483365	3.56975
Pike	11			Blood	MIST11B	0.551	-21.7547	29.1661	-21.9542	28.8138	0.463735	3.65112
Pike	11			Fin	MIST11F	0.607	-20.9529	29.4987	-22.0858	29.0521	0.433763	3.72122
Pike	12	650	1.8	Muscle	MIST12M	0.583	-22.6195	29.5653	-22.6195	29.5653	0.31219	3.87216
Pike	12			Plasma	MIST12P	0.53	-22.9232	29.863	-22.6555	29.645	0.303983	3.89559
Pike	12			Blood	MIST12B	0.673	-22.602	29.6853	-22.8015	29.333	0.270735	3.80383
Pike	12			Fin	MIST12F	0.58	-21.7064	30.1165	-22.8393	29.6699	0.262126	3.90292
Pike	13	870	4.5	Muscle	MIST13M	0.652	-21.3099	28.7185	-21.3099	28.7185	0.610512	3.62308
Pike	13			Plasma	MIST13P	0.713	-20.5382	28.6464	-20.2705	28.4284	0.847278	3.53777
Pike	13			Blood	MIST13B	0.691	-20.5538	29.2028	-20.7533	28.8505	0.737294	3.66191
Pike	13			Fin	MIST13F	0.736	-19.8634	28.5337	-20.9963	28.0872	0.681933	3.43741
Pike	14	900	5	Muscle	MIST14M	0.606	-23.2276	28.6096	-23.2276	28.6096	0.173676	3.59105
Pike	14			Plasma	MIST14P	0.691	-23.2656	30.2996	-22.9978	30.0816	0.226006	4.024
Pike	14			Blood	MIST14B	0.678	-22.7995	30.0896	-22.999	29.7373	0.225735	3.92273
Pike	14			Fin	MIST14F	0.665	-21.8819	30.1754	-23.0148	29.7288	0.222152	3.92024
Perch	1	290	0.2	Muscle	MIOK1M	0.718	-23.1938	29.9676	-23.1938	29.9676	0.181359	3.99048
Perch	1			Plasma	MIOK1P	0.761	-22.8807	28.7029	-22.1952	29.4261	0.408839	3.83121
Perch	1			Blood	MIOK1B	0.706	-23.2578	29.6845	-22.5949	29.9257	0.317789	3.97814
Perch	1			Fin	MIOK1F	0.583	-21.5066	29.8946	-22.6567	30.2695	0.303703	4.07927
Perch	2	270	0.18	Muscle	MIOK2M	0.552	-23.8838	29.5317	-23.8838	29.5317	0.0241838	3.86228
Perch	2			Plasma	MIOK2P	0.758	-22.6871	28.9262	-22.0015	29.6495	0.452959	3.8969
Perch	2			Blood	MIOK2B	0.548	-23.5517	29.3931	-22.8888	29.6342	0.250833	3.89241
Perch	2			Fin	MIOK2F	0.708	-22.5511	29.7144	-23.7012	30.0893	0.0657926	4.02627
Perch	3	340	0.48	Muscle	MIOK3M	0.678	-22.8641	29.9065	-22.8641	29.9065	0.256473	3.97249
Perch	3			Plasma	MIOK3P	0.645	-24.4538	29.1164	-23.7683	29.8396	0.050504	3.95283
Perch	3			Blood	MIOK3B	0.697	-23.5049	29.5112	-22.842	29.7523	0.261506	3.92714
Perch	3			Fin	MIOK3F	0.764	-22.0188	29.5009	-23.1689	29.8758	0.187039	3.96347
Perch	4	300	0.35	Muscle	MIOK4M	0.712	-23.4933	29.9345	-22.9848	28.0339	0.228972	3.42174
Perch	4			Plasma	MIOK4P	0.727	-23.7905	29.2714	-23.1049	29.9946	0.201607	3.99842
Perch	4			Blood	MIOK4B	0.652	-23.7573	29.6615	-23.0944	29.9026	0.204012	3.97136
Perch	4			Fin	MIOK4F	0.683	-22.2429	29.9888	-23.393	30.3637	0.135994	4.10696
Perch	5	310	0.41	Muscle	MIOK5M	0.679	-23.069	29.9385	-23.069	29.9385	0.209802	3.9819
Perch	5			Plasma	MIOK5P	0.691	-23.5319	29.3563	-22.8463	30.0795	0.260516	4.02339
Perch	5			Blood	MIOK5B	0.765	-23.8046	29.5717	-23.1418	29.8128	0.193217	3.94493
Perch	5			Fin	MIOK5F	0.727	-21.9124	30.1496	-23.0625	30.5245	0.211272	4.15427
Perch	6	370	0.66	Muscle	MIOK6M	0.668	-22.9671	29.6705	-22.9671	29.6705	0.233016	3.90307
Perch	6			Plasma	MIOK6P	0.732	-24.5969	28.3659	-23.9114	29.0891	0.0179109	3.73208
Perch	6			Blood	MIOK6B	0.747	-23.6432	28.9166	-22.9803	29.1577	0.230004	3.75228
Perch	6			Fin	MIOK6F	0.704	-22.0514	29.281	-23.2015	29.6559	0.179603	3.89878
Perch	7	285	0.3	Muscle	MIOK7M	0.634	-22.144	28.3122	-22.144	28.3122	0.420495	3.5036
Perch	7			Plasma	MIOK7P	0.626	-23.1655	26.9315	-22.48	27.6547	0.343969	3.31022
Perch	7			Blood	MIOK7B	0.749	-22.4888	27.6349	-21.8259	27.876	0.492964	3.3753
Perch	7			Fin	MIOK7F	0.585	-21.2085	27.1712	-22.3586	27.5461	0.371612	3.27827
Perch	8	295	0.35	Muscle	MIOK8M	0.638	-23.4515	29.589	-23.4515	29.589	0.122662	3.87912
Perch	8			Plasma	MIOK8P	0.709	-24.0516	28.9907	-23.3661	29.7139	0.142117	3.91585
Perch	8			Blood	MIOK8B	0.584	-23.7943	29.3229	-21.8259	27.876	0.492964	3.3753
Perch	8			Fin	MIOK8F	0.751	-22.0303	29.5614	-23.1804	29.9363	0.184412	3.98128
Perch	9	325	0.45	Muscle	MIOK9M	0.621	-22.9214	29.7621	-22.9214	29.7621	0.243412	3.93002
Perch	9			Plasma	MIOK9P	0.672	-24.103	28.9493	-23.4175	29.6725	0.130418	3.90367
Perch	9			Blood	MIOK9B	0.674	-23.6283	29.2285	-22.9655	29.4696	0.233377	3.84401
Perch	9			Fin	MIOK9F	0.737	-21.8761	29.1106	-23.0263	29.4855	0.219533	3.84867
Perch	10	300	0.35	Muscle	MIOK10M	0.676	-23.7486	30.0622	-23.7486	30.0622	0.0549875	4.01828
Perch	10			Plasma	MIOK10P	0.736	-24.0589	29.6216	-23.3733	30.3448	0.140475	4.10141
Perch	10			Blood	MIOK10B	0.615	-24.3032	29.6315	-23.6403	29.8726	0.0796578	3.96253
Perch	10			Fin	MIOK10F	0.762	-22.3637	29.4953	-23.5138	29.8702	0.10847	3.96184
Perch	11	310	0.41	Muscle	MIOK11M	0.635	-21.8975	28.1972	-21.8975	28.1972	0.476659	3.46976
Perch	11			Plasma	MIOK11P	0.676	-22.6159	27.6744	-21.9304	28.3976	0.469168	3.5287
Perch	11			Blood	MIOK11B	0.686	-22.3219	27.7928	-21.6591	28.0339	0.530963	3.42174
Perch	11			Fin	MIOK11F	0.733	-20.4543	27.8369	-21.6044	28.2118	0.543417	3.47405
Perch	12	265	0.25	Muscle	MIOK12M	0.73	-21.9642	28.4176	-21.9642	28.4176	0.461454	3.53458
Perch	12			Plasma	MIOK12P	0.534	-22.0064	28.0312	-21.3209	28.7544	0.608	3.63365
Perch	12			Blood	MIOK12B	0.635	-22.1855	27.8321	-21.5226	28.0732	0.562053	3.43331
Perch	12			Fin	MIOK12F	0.649	-20.5921	26.9908	-21.7422	27.3657	0.512018	3.2252
Perch	13	280	0.3	Muscle	MIOK13M	0.732	-22.1572	29.4613	-22.1572	29.4613	0.417497	3.84157
Perch	13			Plasma	P		-23.2555	26.9325	-22.57	27.6557	0.323468	3.31051
Perch	13			Blood	B		-22.8845	27.4249	-22.2216	27.666	0.402818	3.31354
Perch	13			Fin	MIOK13F	0.549	-20.9146	28.7897	-22.0647	28.1646	0.438567	3.46018
Perch	14	220	0.15	Muscle	MIOK14M	0.682	-22.2596	29.2723	-22.2596	29.2723	0.394163	3.78597
Perch	14			Plasma	P		-23.164	28.4743	-22.4785	29.1975	0.344305	3.76396
Perch	14			Blood	B		-22.9385	29.204	-22.2756	29.4451	0.390524	3.83679
Perch	14			Fin	MIOK14F	0.769	-20.6029	28.5925	-21.753	28.9674	0.509577	3.69629
Perch	15	220	0.15	Muscle	MIOK15M	0.705	-22.65	28.9051	-22.65	28.9051	0.305232	3.67798
Perch	15			Plasma	P		-23.5651	28.3743	-22.8796	29.0975	0.252938	3.73455
Perch	15			Blood	B		-23.0135	28.9744	-22.3506	29.2156	0.37344	3.76928
Perch	15			Fin	MIOK15F	0.553	-21.6566	27.7401	-22.8067	28.115	0.269539	3.44559
Rudd	1	390	1.02	Muscle	MIPE1M	0.723	-17.904	25.1666	-17.904	25.1666	1.38633	2.57841
Rudd	1			Plasma	MIPE1P	0.524	-20.2963	22.6582	-16.4122	26.0067	1.72616	2.82551
Rudd	1			Blood	MIPE1B	0.725	-18.969	23.7514	-18.445	25.0753	1.26309	2.55157
Rudd	1			Fin	MIPE1F	0.681	-17.7569	24.0352	-17.802	25.5741	1.40958	2.69826
Rudd	2	420	1.29	Muscle	MIPE2M	0.586	-18.3308	24.5334	-18.3308	24.5334	1.28911	2.39218
Rudd	2			Plasma	MIPE2P	0.64	-21.0902	21.2169	-17.2061	24.5655	1.54531	2.40161
Rudd	2			Blood	MIPE2B	0.677	-18.9187	23.2093	-18.3947	24.5332	1.27456	2.39212
Rudd	2			Fin	MIPE2F	0.656	-17.8312	23.2125	-17.8763	24.7514	1.39264	2.45629
Rudd	3	300	0.37	Muscle	MIPE3M	0.549	-19.9176	21.0322	-19.9176	21.0322	0.927664	1.36241
Rudd	3			Plasma	MIPE3P	0.612	-23.5278	16.6155	-19.6436	19.9641	0.990063	1.04826
Rudd	3			Blood	MIPE3B	0.653	-19.9961	19.3894	-19.4721	20.7132	1.02913	1.2686
Rudd	3			Fin	MIPE3F	0.777	-20.3079	19.0157	-20.353	20.5545	0.828483	1.22191
Rudd	4	280	0.3	Muscle	MIPE4M	0.761	-18.4839	22.8692	-18.4839	22.8692	1.25425	1.90271
Rudd	4			Plasma	MIPE4P	0.662	-22.8026	19.0703	-18.9185	22.4188	1.15524	1.77024
Rudd	4			Blood	MIPE4B	0.766	-19.5521	20.875	-19.0281	22.1989	1.13026	1.70554
Rudd	4			Fin	MIPE4F	0.662	-19.5486	21.1914	-19.5937	22.7303	1.00144	1.86184
Rudd	5	390	1.02	Muscle	MIPE5M	0.559	-19.7304	24.9285	-19.7304	24.9285	0.9703	2.50837
Rudd	5			Plasma	MIPE5P	0.666	-22.3751	22.8244	-18.4909	26.173	1.25263	2.8744
Rudd	5			Blood	MIPE5B	0.728	-20.2478	25.11	-19.7238	26.4338	0.971795	2.95113
Rudd	5			Fin	MIPE5F	0.601	-18.4891	23.473	-18.5342	25.0118	1.24278	2.53289
Rudd	6	245	0.2	Muscle	MIPE6M	0.752	-19.1496	23.9139	-19.1496	23.9139	1.1026	2.20998
Rudd	6			Plasma	MIPE6P	0.736	-23.0158	20.3449	-19.1317	23.6934	1.10668	2.14512
Rudd	6			Blood	MIPE6B	0.616	-19.2601	22.6721	-18.7361	23.996	1.1968	2.23412
Rudd	6			Fin	MIPE6F	0.549	-19.1395	21.6301	-19.1846	23.169	1.09462	1.99087
Rudd	7	280	0.3	Muscle	MIPE7M	0.604	-19.3269	22.2144	-19.3269	22.2144	1.0622	1.71011
Rudd	7			Plasma	MIPE7P	0.685	-23.8926	18.9305	-20.0085	22.2791	0.906948	1.72913
Rudd	7			Blood	MIPE7B	0.52	-19.9556	21.1452	-19.4316	22.4691	1.03836	1.78503
Rudd	7			Fin	MIPE7F	0.629	-20.5004	20.8228	-20.5455	22.3616	0.784619	1.75342
Rudd	8	340	0.5	Muscle	MIPE8M	0.683	-18.0851	22.9736	-18.0851	22.9736	1.34508	1.93342
Rudd	8			Plasma	MIPE8P	0.577	-22.1805	20.6804	-18.2963	24.029	1.29696	2.24382
Rudd	8			Blood	MIPE8B	0.586	-19.408	22.3803	-18.884	23.7042	1.16309	2.14829
Rudd	8			Fin	MIPE8F	0.655	-18.1998	22.5802	-18.2449	24.119	1.30868	2.27031
Rudd	9	265	0.27	Muscle	MIPE9M	0.658	-19.5705	21.9135	-19.5705	21.9135	1.00671	1.62162
Rudd	9			Plasma	MIPE9P	0.718	-21.3886	18.4541	-17.5045	21.8026	1.47733	1.58901
Rudd	9			Blood	MIPE9B	0.749	-19.1207	20.6143	-18.5967	21.9382	1.22854	1.62889
Rudd	9			Fin	MIPE9F	0.603	-19.0279	20.0861	-19.073	21.625	1.12004	1.53676
Rudd	10	290	0.35	Muscle	MIPE10M	0.644	-18.9626	22.0183	-18.9626	22.0183	1.1452	1.65245
Rudd	10			Plasma	MIPE10P	0.571	-22.9261	17.3911	-19.042	20.7397	1.12712	1.27638
Rudd	10			Blood	MIPE10B	0.698	-19.2215	20.5094	-18.6975	21.8332	1.20558	1.59801
Rudd	10			Fin	MIPE10F	0.705	-19.3693	19.7376	-19.4144	21.2764	1.04228	1.43424
Rudd	11	305	0.39	Muscle	MIPE11M	0.694	-18.3456	23.5734	-18.3456	23.5734	1.28574	2.10981
Rudd	11			Plasma	MIPE11P	0.624	-22.3809	20.3669	-18.4968	23.7154	1.25131	2.15159
Rudd	11			Blood	MIPE11B	0.763	-18.5887	21.8294	-18.0647	23.1533	1.34972	1.98626
Rudd	11			Fin	MIPE11F	0.634	-17.1564	21.9521	-17.2015	23.491	1.54635	2.08558
Rudd	12	290	0.35	Muscle	MIPE12M	0.684	-17.8722	24.6735	-17.8722	24.6735	1.39358	2.43339
Rudd	12			Plasma	MIPE12P	0.703	-23.0117	21.4286	-19.1275	24.7771	1.10762	2.46386
Rudd	12			Blood	MIPE12B	0.757	-18.7954	23.1784	-18.2714	24.5023	1.30263	2.38304
Rudd	12			Fin	MIPE12F	0.721	-18.6103	23.3276	-18.6554	24.8664	1.21518	2.49012
Rudd	13	275	0.28	Muscle	MIPE13M	0.576	-18.057	21.7733	-18.057	21.7733	1.35149	1.5804
Rudd	13			Plasma	MIPE13P	0.689	-21.1771	19.6162	-17.2929	22.9648	1.52553	1.93081
Rudd	13			Blood	MIPE13B	0.606	-18.8084	20.6198	-18.2844	21.9437	1.29969	1.6305
Rudd	13			Fin	MIPE13F	0.742	-18.2035	20.6572	-18.2486	22.196	1.30784	1.70471
Rudd	14	270	0.28	Muscle	MIPE14M	0.719	-18.3133	23.6821	-18.3133	23.6821	1.2931	2.1418
Rudd	14			Plasma	MIPE14P	0.524	-22.6216	18.8385	-18.7374	22.1871	1.19648	1.70208
Rudd	14			Blood	MIPE14B	0.667	-18.5494	22.212	-18.0254	23.5359	1.35869	2.0988
Rudd	14			Fin	MIPE14F	0.678	-18.4804	21.6545	-18.5255	23.1933	1.24477	1.99804
Rudd	15	265	0.27	Muscle	MIPE15M	0.704	-18.9588	24.3331	-18.9588	24.3331	1.14606	2.33325
Rudd	15			Plasma	MIPE15P	0.555	-22.4467	21.1107	-18.5626	24.4593	1.23632	2.37038
Rudd	15			Blood	MIPE15B	0.643	-19.3144	23.2805	-18.7905	24.6044	1.18441	2.41305
Rudd	15			Fin	MIPE15F	0.709	-18.9093	22.9566	-18.9544	24.4955	1.14706	2.38102

## Sheet: Zlutice
Species	Individual	TL [mm]	W [kg]	Tissue	Identifier	Amount	d13C Primary data	d15N Primary data	d13C After centering	d15N After centering	d13Ccorr After normalization	TP d15N After normalization
Catfish	1	820	3.5	Muscle	ZLSU1M	0.624	-24.88	12.2194	-26.0275	17.1258	0.354458	3.51935
Catfish	1			Plasma	ZLSU1P	0.52	-25.9204	14.1217	-24.596	12.8268	0.536819	2.25493
Catfish	1			Blood	ZLSU1B	0.747	-24.5642	12.142	-24.4525	11.6844	0.555099	1.91894
Catfish	1			Fin	ZLSU1F	0.749	-23.6976	12.6934	-24.0924	12.088	0.600967	2.03764
Catfish	2	1100	7.9	Muscle	ZLSU4M	0.567	-25.9257	14.4406	-25.9257	14.4406	0.367425	2.7296
Catfish	2			Plasma	ZLSU4P	0.635	-27.5215	17.5913	-26.1971	16.2963	0.332853	3.27539
Catfish	2			Blood	ZLSU4B	0.74	-26.1698	15.489	-26.0581	15.0314	0.350563	2.90334
Catfish	2			Fin	ZLSU4F		0.417677	33.3952	-26.0511	16.5	0.351452	3.33529
Catfish	3	1120	9.3	Muscle	ZLSU5M	0.59	-26.2559	17.3649	-26.2559	17.3649	0.325364	3.58967
Catfish	3			Plasma	ZLSU5P	0.754	-26.2865	18.6106	-24.9622	17.3157	0.490171	3.57519
Catfish	3			Blood	ZLSU5B	0.757	-25.6887	17.4538	-25.577	16.9962	0.411842	3.48123
Catfish	3			Fin	ZLSU5F	0.541	-25.168	17.936	-25.5628	17.3305	0.41365	3.57956
Catfish	4	880	4.6	Muscle	ZLSU6M	0.76	-33.0263	13.2437	-33.0263	13.2437	-0.537114	2.37757
Catfish	4			Plasma	ZLSU6P	0.622	-28.0344	17.927	-26.71	16.632	0.267513	3.37412
Catfish	4			Blood	ZLSU6B	0.725	-26.9397	16.5199	-26.828	16.0622	0.252489	3.20654
Catfish	4			Fin	ZLSU6F	0.62	-26.2563	17.0818	-26.6511	16.4763	0.275013	3.32832
Catfish	5	1010	6.9	Muscle	ZLSU7M	0.634	-27.5739	17.0882	-27.5739	17.0882	0.157471	3.5083
Catfish	5			Plasma	ZLSU7P	0.577	-27.4704	18.5092	-26.1461	17.2142	0.339356	3.54536
Catfish	5			Blood	ZLSU7B	0.664	-26.6054	17.7878	-26.4937	17.3302	0.295069	3.57946
Catfish	5			Fin	ZLSU7F	0.54	-26.2167	17.9932	-26.6115	17.3877	0.280065	3.59638
Catfish	6	630	1.6	Muscle	ZLSU8M	0.625	-26.0328	16.0222	-26.0328	16.0222	0.353779	3.19477
Catfish	6			Plasma	ZLSU8P	0.558	-26.8056	16.8622	-25.4812	15.5673	0.424052	3.06096
Catfish	6			Blood	ZLSU8B	0.653	-25.6967	16.7506	-25.585	16.293	0.41083	3.27442
Catfish	6			Fin	ZLSU8F	0.526	-34.3756	16.758	-34.7704	16.1525	-0.759286	3.2331
Catfish	7	1280	13.4	Muscle	ZLSU9M	0.625	-29.8297	16.3283	-29.8297	16.3283	-0.129903	3.2848
Catfish	7			Plasma	ZLSU9P	0.542	-28.2032	17.9411	-26.8788	16.6462	0.246011	3.37829
Catfish	7			Blood	ZLSU9B	0.665	-27.1971	16.8199	-27.0854	16.3623	0.219696	3.29479
Catfish	7			Fin	ZLSU9F	0.693	-26.6298	16.7568	-27.0246	16.1513	0.22744	3.23274
Catfish	8	1470	17.7	Muscle	ZLSU10M	0.67	-31.5555	16.6092	-31.5555	16.6092	-0.349744	3.36741
Catfish	8			Plasma	ZLSU10P	0.582	-28.3673	18.333	-27.0429	17.038	0.225105	3.49354
Catfish	8			Blood	ZLSU10B	0.686	-26.3398	17.8702	-26.2281	17.4126	0.328906	3.60371
Catfish	8			Fin	ZLSU10F	0.567	-26.2702	18.4272	-26.665	17.8217	0.273244	3.72404
Catfish	9	1350	15.3	Muscle	ZLSU11M	0.596	-27.0303	16.7568	-27.0303	16.7568	0.226707	3.41082
Catfish	9			Plasma	ZLSU11P	0.554	-28.5109	17.8945	-27.1865	16.5996	0.206816	3.36458
Catfish	9			Blood	ZLSU11B	0.569	-27.142	17.1231	-27.0304	16.6654	0.226707	3.38395
Catfish	9			Fin	ZLSU11F	0.656	-26.3108	17.4804	-26.7056	16.875	0.268079	3.44557
Catfish	10	1360	18.7	Muscle	ZLSU13M	0.767	-26.938	17.2965	-26.938	17.2965	0.238469	3.56955
Catfish	10			Plasma	ZLSU13P	0.651	-28.3025	18.1496	-26.9781	16.8546	0.23336	3.4396
Catfish	10			Blood	ZLSU13B	0.656	-26.9944	17.5584	-26.8828	17.1008	0.245509	3.51199
Catfish	10			Fin	ZLSU13F	0.662	-25.6492	17.5026	-26.044	16.8971	0.35236	3.45209
Catfish	11	770	2.8	Muscle	ZLSU14M	0.737	-24.2394	14.5271	-24.2394	14.5271	0.582241	2.75502
Catfish	11			Plasma	ZLSU14P	0.673	-26.8082	16.9505	-25.4839	15.6555	0.423713	3.08692
Catfish	11			Blood	ZLSU14B	0.548	-25.8323	15.7123	-25.7206	15.2547	0.39355	2.96902
Catfish	11			Fin	ZLSU14F	0.585	-25.0156	15.8172	-25.4104	15.2117	0.433074	2.95639
Catfish	12	1020	7.8	Muscle	ZLSU15M	0.613	-26.2888	15.6375	-26.2888	15.6375	0.321166	3.08163
Catfish	12			Plasma	ZLSU15P	0.765	-30.097	17.7941	-28.7726	16.4991	0.00476146	3.33504
Catfish	12			Blood	ZLSU15B	0.687	-26.9863	16.986	-26.8747	16.5284	0.246541	3.34365
Catfish	12			Fin	ZLSU15F	0.658	-26.1225	17.3559	-26.5173	16.7504	0.292066	3.40894
Catfish	13	740	2.9	Muscle	ZLSU16M	0.71	-25.9377	16.2044	-25.9377	16.2044	0.327145	3.37761
Catfish	13			Plasma	ZLSU16P	0.712	-27.3534	15.5989	-26.029	14.3039	0.289061	3.34753
Catfish	13			Blood	ZLSU16B	0.666	-26.0281	16.1226	-25.9164	15.665	0.247368	3.40322
Catfish	13			Fin	ZLSU16F	0.717	-24.8783	15.4084	-25.2731	14.8029	0.334311	3.49502
Catfish	14	900	5.1	Muscle	ZLSU17M	0.63	-26.2026	16.7422	-26.2026	16.7422	0.3659	3.24834
Catfish	14			Plasma	ZLSU17P	0.592	-27.5848	18.2355	-26.2604	16.9405	0.354265	2.68939
Catfish	14			Blood	ZLSU17B	0.768	-26.8908	17.687	-26.7791	17.2294	0.368616	3.08969
Catfish	14			Fin	ZLSU17F	0.598	-26.0059	17.1254	-26.4008	16.5199	0.450563	2.83615
Catfish	15	1470	21	Muscle	ZLSU20M	0.679	-27.1031	16.6928	-27.1031	16.6928	0.332156	3.40652
Catfish	15			Plasma	ZLSU20P	0.736	-28.2813	17.5417	-26.9569	16.2468	0.324791	3.46487
Catfish	15			Blood	ZLSU20B	0.577	-26.5046	16.9475	-26.3929	16.4899	0.258713	3.54983
Catfish	15			Fin	ZLSU20F	0.692	-25.7779	16.8619	-26.1727	16.2564	0.306911	3.34114
Catfish	16	1280	12.2	Muscle	ZLSU24M	0.628	-26.3975	16.9853	-26.3975	16.9853	0.217436	3.392
Catfish	16			Plasma	ZLSU24P	0.687	-27.7947	18.2204	-26.4703	16.9255	0.236062	3.26081
Catfish	16			Blood	ZLSU24B	0.718	-26.4846	17.4558	-26.3729	16.9982	0.307909	3.33231
Catfish	16			Fin	ZLSU24F	0.628	-25.7589	17.8856	-26.1537	17.2801	0.335957	3.26364
Catfish	17	118	8.7	Muscle	ZLRECSU15M	0.619	-26.2419	16.6439	-26.2419	16.6439	0.307323	3.47802
Catfish	17			Plasma	ZLRECSU15P	0.727	-27.8653	17.8365	-26.5409	16.5416	0.298049	3.46044
Catfish	17			Blood	ZLRECSU15B	0.716	-26.9798	17.1886	-26.8682	16.7309	0.310464	3.48181
Catfish	17			Fin	ZLRECSU15F	0.727	-26.074	17.5007	-26.1857	17.0431	0.33838	3.56475
Catfish	18	12.7	15	Muscle	ZLRECSU24M	0.655	-25.7647	17.1529	-25.7647	17.1529	0.387933	3.52731
Catfish	18			Plasma	ZLRECSU24P	0.536	-27.1593	18.1804	-25.8349	16.8854	0.378997	3.44865
Catfish	18			Blood	ZLRECSU24B	0.668	-25.9569	17.8469	-25.8452	17.3892	0.377686	3.59684
Catfish	18			Fin	ZLRECSU24F	0.596	-25.5157	17.6877	-25.9105	17.0822	0.369359	3.50653
Pike	1	62	1.5	Muscle	ZLST1M	0.63	-27.3278	15.5059	-27.3278	15.5059	0.18881	3.04291
Pike	1			Plasma	ZLST1P	0.74	-29.9293	15.4341	-28.7601	15.69	0.00636235	3.09705
Pike	1			Blood	ZLST1B	0.734	-27.2011	14.8863	-27.0403	14.7686	0.225442	2.82604
Pike	1			Fin	ZLST1F	0.619	-27.0842	15.4242	-27.5432	15.5029	0.16137	3.04204
Pike	2	53	1	Muscle	ZLST2M	0.627	-27.5262	14.6958	-27.5262	14.6958	0.163545	2.80465
Pike	2			Plasma	P		-27.5591	14.4341	-26.3898	14.69	0.308307	2.80294
Pike	2			Blood	ZLST2B	0.766	-28.0398	15.0007	-27.8789	14.8829	0.118607	2.85968
Pike	2			Fin	ZLST2F	0.61	-27.1038	14.767	-27.5629	14.8458	0.158868	2.84875
Pike	3	50	0.8	Muscle	ZLST3M	0.697	-28.1667	14.6148	-28.1667	14.6148	0.0819532	2.78081
Pike	3			Plasma	ZLST3P	0.592	-28.6324	13.894	-27.4632	14.1499	0.171572	2.64409
Pike	3			Blood	ZLST3B	0.686	-28.2242	15.2146	-28.0633	15.0968	0.0951162	2.92259
Pike	3			Fin	ZLST3F	0.669	-27.0628	14.6306	-27.5219	14.7093	0.164092	2.80863
Pike	4	65	1.8	Muscle	ZLST4M	0.684	-25.985	16.425	-25.985	16.425	0.359873	3.31324
Pike	4			Plasma	ZLST4P	0.731	-27.4917	16.582	-26.3224	16.8379	0.316887	3.43468
Pike	4			Blood	ZLST4B	0.672	-25.937	16.3874	-25.7762	16.2696	0.386473	3.26754
Pike	4			Fin	ZLST4F	0.758	-26.0552	16.6001	-26.5143	16.6788	0.292444	3.38787
Pike	5	53	1	Muscle	ZLST5M	0.667	-26.9585	14.6186	-26.9585	14.6186	0.235865	2.78195
Pike	5			Plasma	ZLST5P	0.635	-27.5199	13.3615	-26.3506	13.6175	0.313301	2.48749
Pike	5			Blood	ZLST5B	0.635	-26.6958	14.9403	-26.5349	14.8225	0.289817	2.84192
Pike	5			Fin	ZLST5F	0.575	-26.6407	14.6113	-27.0998	14.69	0.217855	2.80294
Pike	6	64	1.7	Muscle	ZLST6M	0.698	-27.2132	15.8502	-27.2132	15.8502	0.203413	3.14419
Pike	6			Plasma	ZLST6P	0.568	-27.8165	15.9832	-26.6472	16.2391	0.275518	3.25856
Pike	6			Blood	ZLST6B	0.673	-27.2192	15.8201	-27.0583	15.7023	0.223142	3.10069
Pike	6			Fin	ZLST6F	0.521	-26.4729	15.6652	-26.932	15.7439	0.239234	3.11291
Pike	7	93	5.9	Muscle	ZLST7M	0.652	-26.9064	17.2073	-26.9064	17.2073	0.242495	3.54332
Pike	7			Plasma	ZLST7P	0.752	-28.2709	17.1562	-27.1016	17.4121	0.217628	3.60357
Pike	7			Blood	ZLST7B	0.607	-27.1702	17.0785	-27.0094	16.9607	0.229382	3.4708
Pike	7			Fin	ZLST7F	0.724	-26.2677	17.2923	-26.7268	17.371	0.265376	3.59147
Pike	8	89	5	Muscle	ZLST8M	0.638	-27.037	17.0796	-27.037	17.0796	0.225865	3.50577
Pike	8			Plasma	ZLST8P	0.71	-27.9327	17.0269	-26.7634	17.2828	0.260714	3.56553
Pike	8			Blood	ZLST8B	0.751	-27.4772	17.0823	-27.3164	16.9646	0.190267	3.47193
Pike	8			Fin	ZLST8F	0.731	-26.5848	17.1967	-27.0439	17.2754	0.224979	3.56336
Pike	9	50	0.8	Muscle	ZLST9M	0.673	-26.5376	14.9596	-26.5376	14.9596	0.289482	2.88224
Pike	9			Plasma	ZLST9P	0.528	-28.6198	14.3779	-27.4505	14.6338	0.17318	2.78642
Pike	9			Blood	ZLST9B	0.531	-26.8273	14.7532	-26.6664	14.6354	0.273067	2.78688
Pike	9			Fin	ZLST9F	0.659	-26.278	14.7043	-26.7371	14.783	0.264059	2.8303
Pike	10	61	1.5	Muscle	ZLST10M	0.766	-26.7102	15.0832	-26.7102	15.0832	0.267487	2.91858
Pike	10			Plasma	ZLST10P	0.641	-28.5514	15.0891	-27.3821	15.345	0.181896	2.9956
Pike	10			Blood	ZLST10B	0.701	-26.7953	15.4294	-26.6344	15.3116	0.277141	2.98578
Pike	10			Fin	ZLST10F	0.702	-26.4247	15.0215	-26.8838	15.1002	0.245379	2.92359
Pike	11	58	1.2	Muscle	ZLST11M	0.584	-27.073	14.2305	-27.073	14.2305	0.221271	2.66778
Pike	11			Plasma	ZLST11P	0.737	-28.0084	14.1578	-26.8391	14.4137	0.251066	2.72168
Pike	11			Blood	ZLST11B	0.638	-27.0766	14.7966	-26.9158	14.6788	0.241305	2.79966
Pike	11			Fin	ZLST11F	0.726	-26.442	14.3745	-26.9011	14.4532	0.243173	2.73329
Pike	12	52	0.9	Muscle	ZLST12M	0.521	-28.524	14.5574	-28.524	14.5574	0.0364323	2.76395
Pike	12			Plasma	ZLST12P	0.531	-29.7491	13.8174	-28.5798	14.0733	0.029326	2.62157
Pike	12			Blood	ZLST12B	0.68	-28.4861	15.1169	-28.3253	14.9991	0.0617478	2.89386
Pike	12			Fin	ZLST12F	0.605	-28.0784	14.7441	-28.5375	14.8228	0.034719	2.842
Pike	15	55	1	Muscle	ZLST15M	0.671	-27.1312	16.3716	-27.1312	16.3716	0.213854	3.29753
Pike	15			Plasma	P		-28.7491	15.8174	-27.5798	16.0733	0.156715	3.2098
Pike	15			Blood	ZLST15B	0.754	-27.8014	16.6199	-27.6406	16.5021	0.148971	3.33591
Pike	15			Fin	ZLST15F	0.632	-26.8055	16.2077	-27.2646	16.2864	0.196862	3.27247
Perch	1	320	0.46	Muscle	ZLOK1M	0.636	-29.3552	15.0531	-29.3552	15.0531	-0.0694571	2.90973
Perch	1			Plasma	ZLOK1P	0.625	-29.5586	14.8209	-27.9443	16.0421	0.110286	3.20061
Perch	1			Blood	ZLOK1B	0.623	-29.4943	14.1864	-28.5709	15.0098	0.0304596	2.89699
Perch	1			Fin	ZLOK1F	0.575	-28.7645	15.8542	-28.7641	15.1771	0.00584857	2.9462
Perch	2	290	0.35	Muscle	ZLOK2M	0.618	-28.3996	15.0119	-28.3996	15.0119	0.0522781	2.89762
Perch	2			Plasma	P		-30.5031	14.3012	-28.8888	15.1745	-0.0100382	2.94545
Perch	2			Blood	ZLOK2B	0.545	-29.3105	14.0059	-28.3871	14.8293	0.0538774	2.84391
Perch	2			Fin	ZLOK2F	0.638	-28.3531	15.7974	-28.3527	15.1203	0.0582535	2.92949
Perch	3	320	0.48	Muscle	ZLOK3M	0.702	-28.9553	15.4763	-28.9553	15.4763	-0.0185062	3.03421
Perch	3			Plasma	ZLOK3P	0.594	-30.0601	13.8987	-28.4457	15.4367	0.0464026	3.02255
Perch	3			Blood	ZLOK3B	0.532	-29.5991	14.6567	-28.6757	15.48	0.0171104	3.0353
Perch	3			Fin	ZLOK3F	0.721	-28.7345	15.8934	-28.7342	15.2162	0.00966199	2.95771
Perch	4	320	0.47	Muscle	ZLOK4M	0.523	-27.4885	14.4203	-27.4885	14.4203	0.168341	2.72363
Perch	4			Plasma	ZLOK4P	0.662	-29.2375	13.7925	-27.6232	15.4344	0.151191	3.02189
Perch	4			Blood	ZLOK4B	0.703	-28.1245	14.1083	-27.2011	14.9317	0.204958	2.87402
Perch	4			Fin	ZLOK4F	0.756	-27.2613	15.3203	-27.2609	14.6431	0.197333	2.78915
Perch	5	290	0.35	Muscle	ZLOK5M	0.674	-27.962	14.5221	-27.962	14.5221	0.108025	2.75355
Perch	5			Plasma	ZLOK5P	0.616	-29.5424	13.923	-27.928	15.5568	0.112351	3.05788
Perch	5			Blood	ZLOK5B	0.62	-28.8275	13.6118	-27.9041	14.4351	0.115399	2.72798
Perch	5			Fin	ZLOK5F	0.75	-27.9922	15.3379	-27.9919	14.6608	0.104222	2.79435
Perch	6	350	0.52	Muscle	ZLOK6M	0.52	-27.9582	13.6803	-27.9582	13.6803	0.108513	2.50598
Perch	6			Plasma	ZLOK6P	0.669	-29.7953	13.465	-28.181	15.2937	0.080127	2.9805
Perch	6			Blood	ZLOK6B	0.665	-29.1491	13.2054	-28.2257	14.0288	0.0744298	2.60846
Perch	6			Fin	ZLOK6F	0.665	-27.5673	15.2658	-27.5669	14.5886	0.158353	2.77313
Perch	7	290	0.35	Muscle	ZLOK7M	0.568	-28.3602	15.2337	-28.3602	15.2337	0.0572991	2.96285
Perch	7			Plasma	ZLOK7P		-29.6393	14.6666	-28.025	15.54	0.1	3.05294
Perch	7			Blood	ZLOK7B	0.625	-29.4779	14.0713	-28.5545	14.8946	0.0325465	2.86312
Perch	7			Fin	ZLOK7F	0.555	-28.2614	15.7657	-28.261	15.0886	0.0699357	2.92017
Perch	8	280	0.3	Muscle	ZLOK8M	0.735	-28.3408	14.6834	-28.3408	14.6834	0.0597664	2.80101
Perch	8			Plasma	ZLOK8P	0.595	-31.5967	13.0532	-29.9824	14.5537	-0.149348	2.76285
Perch	8			Blood	ZLOK8B	0.589	-29.9536	13.3329	-29.0302	14.1562	-0.0280525	2.64595
Perch	8			Fin	ZLOK8F	0.746	-28.9315	14.3119	-28.9312	13.6348	-0.0154373	2.49258
Perch	9	280	0.3	Muscle	ZLOK9M	0.644	-29.0116	14.5633	-29.0116	14.5633	-0.0256754	2.76568
Perch	9			Plasma	ZLOK9P		-31.5031	12.3012	-29.8888	13.1745	-0.137427	2.35722
Perch	9			Blood	ZLOK9B	0.686	-30.999	13.4584	-30.0756	14.2818	-0.161229	2.68288
Perch	9			Fin	ZLOK9F	0.695	-29.8551	14.2954	-29.8548	13.6183	-0.133092	2.48774
Perch	10	300	0.37	Muscle	ZLOK10M	0.565	-29.3668	14.3991	-29.3668	14.3991	-0.0709303	2.71739
Perch	10			Plasma	ZLOK10P	0.553	-30.9383	13.3908	-29.324	15.2725	-0.0654752	2.97426
Perch	10			Blood	ZLOK10B	0.748	-29.5445	13.7929	-28.6211	14.6162	0.0240603	2.78124
Perch	10			Fin	ZLOK10F	0.648	-28.9421	15.234	-28.9417	14.5568	-0.0167803	2.76377
Perch	11	340	0.5	Muscle	ZLOK11M	0.609	-27.8536	15.1687	-27.8536	15.1687	0.121831	2.94374
Perch	11			Plasma	ZLOK11P	0.679	-30.2485	14.6021	-28.6342	15.9264	0.0223962	3.1666
Perch	11			Blood	ZLOK11B	0.735	-28.7339	14.166	-27.8105	14.9893	0.127326	2.89097
Perch	11			Fin	ZLOK11F	0.648	-27.4502	16.2509	-27.4499	15.5738	0.173265	3.06287
Perch	12	320	0.47	Muscle	ZLOK12M	0.71	-27.8929	14.5611	-27.8929	14.5611	0.116832	2.76502
Perch	12			Plasma	ZLOK12P	0.721	-28.9711	13.7612	-27.3568	15.3954	0.185118	3.01042
Perch	12			Blood	ZLOK12B	0.682	-28.2556	13.642	-27.3322	14.4653	0.188258	2.73686
Perch	12			Fin	ZLOK12F	0.673	-27.5846	15.416	-27.5842	14.7389	0.156154	2.81733
Perch	13	300	0.38	Muscle	ZLOK13M	0.763	-29.4017	15.3697	-29.4017	15.3697	-0.0753808	3.00287
Perch	13			Plasma	ZLOK13P	0.604	-31.8827	14.4767	-30.2683	15.8853	-0.185776	3.15449
Perch	13			Blood	ZLOK13B	0.633	-30.6501	14.1568	-29.7267	14.9801	-0.116779	2.88827
Perch	13			Fin	ZLOK13F	0.61	-30.1662	15.9405	-30.1658	15.2634	-0.172714	2.97158
Perch	14	280	0.3	Muscle	ZLOK14M	0.745	-29.7426	14.8336	-29.7426	14.8336	-0.1188	2.84518
Perch	14			Plasma	ZLOK14P	0.664	-32.3813	14.1798	-30.767	15.707	-0.249302	3.10205
Perch	14			Blood	ZLOK14B	0.674	-31.2039	14.146	-30.2805	14.9693	-0.187328	2.8851
Perch	14			Fin	ZLOK14F	0.54	-30.1861	15.1462	-30.1857	14.4691	-0.175251	2.73796
Perch	15	290	0.2	Muscle	ZLOK15M	0.67	-29.1951	14.2214	-29.1951	14.2214	-0.0490515	2.66513
Perch	15			Plasma	ZLOK15P	0.601	-31.7922	13.2545	-30.1779	15.0948	-0.174258	2.922
Perch	15			Blood	ZLOK15B	0.747	-30.2039	12.9263	-29.2805	13.7497	-0.0599376	2.52637
Perch	15			Fin	ZLOK15F	0.699	-29.4519	14.0367	-29.4516	13.3596	-0.0817296	2.41164
Perch	16	300	0.38	Muscle	ZLOK16M	0.581	-27.9675	15.194	-27.9675	15.194	0.107322	2.95118
Perch	16			Plasma	ZLOK16P	0.742	-29.3377	15.3487	-27.7233	16.0674	0.138427	3.20805
Perch	16			Blood	ZLOK16B	0.765	-28.7468	15.0447	-27.8234	15.8681	0.125679	3.14943
Perch	16			Fin	ZLOK16F	0.659	-27.2732	15.6635	-27.2729	14.9864	0.195813	2.89012
Rudd	1	280	0.3	Muscle	ZLPE1M	0.638	-28.7355	15.1491	-28.7355	15.1491	0.00948462	2.93797
Rudd	1			Plasma	ZLPE1P	0.645	-31.9407	14.3061	-28.8224	14.6989	-0.00157491	2.80557
Rudd	1			Blood	ZLPE1B	0.716	-30.2358	14.6487	-28.7818	15.1955	0.00359381	2.95162
Rudd	1			Fin	ZLPE1F	0.528	-29.6785	14.7367	-28.9489	14.6541	-0.0176916	2.79239
Rudd	2	390	1.02	Muscle	ZLPE2M	0.695	-24.3504	14.0759	-24.3504	14.0759	0.568106	2.62232
Rudd	2			Plasma	ZLPE2P	0.725	-28.3765	14.3468	-25.2582	14.7396	0.452455	2.81753
Rudd	2			Blood	ZLPE2B	0.7	-25.9406	14.1219	-24.4866	14.6688	0.550752	2.7967
Rudd	2			Fin	ZLPE2F	0.642	-25.3539	13.9559	-24.6243	13.8734	0.533206	2.56276
Rudd	3	350	0.75	Muscle	ZLPE3M	0.623	-26.3725	14.9591	-26.3725	14.9591	0.310514	2.8821
Rudd	3			Plasma	ZLPE3P	0.671	-29.4118	14.488	-26.2935	14.8808	0.320575	2.85907
Rudd	3			Blood	ZLPE3B	0.691	-28.209	14.1003	-26.755	14.6472	0.261777	2.79035
Rudd	3			Fin	ZLPE3F	0.575	-26.4573	15.2022	-25.7277	15.1196	0.392654	2.9293
Rudd	4	320	0.45	Muscle	ZLPE4M	0.683	-27.3973	15.1613	-27.3973	15.1613	0.179962	2.94157
Rudd	4			Plasma	ZLPE4P	0.709	-30.432	14.8098	-27.3137	15.2027	0.190613	2.95373
Rudd	4			Blood	ZLPE4B	0.525	-28.8635	14.5694	-27.4095	15.1162	0.178403	2.92829
Rudd	4			Fin	ZLPE4F	0.763	-27.8045	15.4027	-27.0749	15.3201	0.221034	2.98827
Rudd	5	340	0.5	Muscle	ZLPE5M	0.609	-26.7754	15.0034	-26.7754	15.0034	0.259179	2.8951
Rudd	5			Plasma	ZLPE5P	0.564	-30.3442	14.8504	-27.2259	15.2432	0.201801	2.96565
Rudd	5			Blood	ZLPE5B	0.547	-28.4208	14.8388	-26.9668	15.3856	0.234802	3.00754
Rudd	5			Fin	ZLPE5F	0.691	-27.6297	15.5724	-26.9001	15.4899	0.243298	3.03819
Rudd	6	350	0.65	Muscle	ZLPE6M	0.657	-26.893	13.6068	-26.893	13.6068	0.244209	2.48435
Rudd	6			Plasma	ZLPE6P	0.696	-30.1472	13.659	-27.0289	14.0518	0.226895	2.61524
Rudd	6			Blood	ZLPE6B	0.739	-27.793	12.88	-26.3391	13.4269	0.314769	2.43143
Rudd	6			Fin	ZLPE6F	0.744	-27.8634	13.555	-27.1338	13.4724	0.21353	2.44482
Rudd	7	320	0.45	Muscle	ZLPE7M	0.641	-28.6242	15.3082	-28.6242	15.3082	0.0236683	2.98476
Rudd	7			Plasma	ZLPE7P	0.714	-31.167	15.3759	-28.0487	15.7688	0.0969831	3.12023
Rudd	7			Blood	ZLPE7B	0.757	-30.0084	14.7178	-28.5544	15.2646	0.0325586	2.97196
Rudd	7			Fin	ZLPE7F	0.527	-29.08	15.8329	-28.3504	15.7504	0.0585474	3.11482
Rudd	8	340	0.5	Muscle	ZLPE8M	0.559	-27.1992	14.2975	-27.1992	14.2975	0.205203	2.68749
Rudd	8			Plasma	ZLPE8P	0.74	-29.4426	13.3212	-26.3243	13.714	0.316646	2.51588
Rudd	8			Blood	ZLPE8B	0.597	-28.5746	13.6641	-27.1206	14.2109	0.215207	2.66203
Rudd	8			Fin	ZLPE8F	0.643	-27.877	15.0934	-27.1474	15.0108	0.211792	2.89731
Rudd	9	370	0.9	Muscle	ZLPE9M	0.764	-26.0424	13.896	-26.0424	13.896	0.352558	2.56941
Rudd	9			Plasma	ZLPE9P	0.636	-29.7761	14.2203	-26.6578	14.6131	0.274171	2.78032
Rudd	9			Blood	ZLPE9B	0.615	-27.4932	13.001	-26.0393	13.5479	0.352959	2.46702
Rudd	9			Fin	ZLPE9F	0.542	-26.8974	14.3577	-26.1678	14.2752	0.336588	2.68094
Rudd	10	280	0.3	Muscle	ZLPE10M	0.638	-27.7355	15.0491	-27.7355	15.0491	0.136873	2.90856
Rudd	10			Plasma	ZLPE10P	0.645	-30.9407	14.0061	-27.8224	14.3989	0.125814	2.71733
Rudd	10			Blood	ZLPE10B	0.716	-29.2358	14.1487	-27.7818	14.6955	0.130982	2.80456
Rudd	10			Fin	ZLPE10F	0.528	-28.6785	14.2367	-27.9489	14.1541	0.109697	2.64533

## Sheet: Rimov
Species	Individual	TL [mm]	W [kg]	Tissue	Identifier	Amount	d13C Primary data	d15N Primary data	d13C After centering	d15N After centering	d13Ccorr After normalization	TP d15N After normalization
Catfish	1	1040	7.7	Muscle	RISU1M	0.531	-22.8744	14.3793	-22.8744	14.3793	0.517489	3.13804
Catfish	1			Plasma	RISU1P	0.527	-23.6119	15.8958	-22.66	14.8956	0.563404	3.28987
Catfish	1			Blood	RISU1B	0.624	-22.8501	14.8912	-23.1272	14.4384	0.463328	3.15542
Catfish	1			Fin	RISU1F	0.567	-21.5713	14.878	-22.3385	14.51	0.632281	3.17648
Catfish	2	950	5.1	Muscle	RISU2M	0.618	-22.6703	14.5848	-22.6703	14.5848	0.561205	3.19848
Catfish	2			Plasma	RISU2P	0.721	-23.8624	15.9153	-22.9105	14.915	0.509748	3.2956
Catfish	2			Blood	RISU2B	0.731	-22.5689	15.3061	-22.846	14.8534	0.523567	3.27746
Catfish	2			Fin	RISU2F	0.675	-22.144	15.6977	-22.9112	15.3298	0.509589	3.41758
Catfish	3	1140	11.5	Muscle	RISU3M	0.691	-23.2676	14.8618	-23.2676	14.8618	0.43325	3.27993
Catfish	3			Plasma	RISU3P	0.673	-25.188	16.0018	-24.2361	15.0015	0.225764	3.32104
Catfish	3			Blood	RISU3B	0.663	-22.5405	15.3814	-22.8176	14.9286	0.529651	3.29958
Catfish	3			Fin	RISU3F	0.638	-22.7118	15.4207	-23.4791	15.0527	0.387949	3.3361
Catfish	4	830	3.7	Muscle	RISU4M	0.567	-22.4565	14.5602	-22.4565	14.5602	0.606999	3.19124
Catfish	4			Plasma	RISU4P	0.72	-22.7868	16.0125	-21.8349	15.0123	0.740169	3.3242
Catfish	4			Blood	RISU4B	0.643	-21.6213	14.996	-21.8984	14.5432	0.726568	3.18624
Catfish	4			Fin	RISU4F	0.74	-21.4386	15.2677	-22.2059	14.8998	0.660694	3.29111
Catfish	5	1200	18.4	Muscle	RISU5M	0.695	-26.7028	14.8346	-26.7028	14.8346	-0.302654	3.27195
Catfish	5			Plasma	RISU5P	0.58	-25.2644	15.5327	-24.3125	14.5324	0.209411	3.18307
Catfish	5			Blood	RISU5B	0.546	-22.8383	15.3147	-23.1154	14.8619	0.465846	3.27998
Catfish	5			Fin	RISU5F	0.709	-22.6061	15.6845	-23.3734	15.3165	0.410583	3.41369
Catfish	6	875	4.2	Muscle	RISU6M	0.661	-22.1537	14.3923	-22.1537	14.3923	0.671863	3.14186
Catfish	6			Plasma	RISU6P	0.698	-23.3464	15.7798	-22.3945	14.7796	0.620288	3.25575
Catfish	6			Blood	RISU6B	0.596	-22.4697	15.028	-22.7468	14.5752	0.544811	3.19566
Catfish	6			Fin	RISU6F	0.751	-22.3384	15.0768	-23.1057	14.7089	0.467932	3.23496
Catfish	7	1380	17.1	Muscle	RISU7P		-22.514	14.475	-22.514	14.475	0.594687	3.16618
Catfish	7			Plasma	RISU7P	0.635	-23.4131	15.0659	-22.4612	14.0657	0.605996	3.04579
Catfish	7			Blood	RISU7B	0.693	-22.9036	15.0262	-23.1807	14.5734	0.451856	3.19513
Catfish	7			Fin	RISU7F	0.763	-22.0318	14.4987	-22.799	14.1307	0.53363	3.06492
Catfish	8	990	5.8	Muscle	RISU8M	0.707	-22.1526	14.8644	-22.1526	14.8644	0.672113	3.2807
Catfish	8			Plasma	RISU8P	0.733	-23.7922	14.9997	-22.8403	13.9994	0.524783	3.02631
Catfish	8			Blood	RISU8B	0.682	-22.3399	14.9322	-22.617	14.4794	0.572623	3.16747
Catfish	8			Fin	RISU8F	0.764	-22.0409	13.8177	-22.8082	13.4497	0.531663	2.86462
Catfish	9	1160	10.2	Muscle	RISU9M	0.76	-21.6078	13.351	-21.6078	13.351	0.78882	2.83558
Catfish	9			Plasma	RISU9P	0.622	-24.543	14.6704	-23.5911	13.6702	0.363949	2.92947
Catfish	9			Blood	RISU9B	0.65	-23.289	14.538	-23.5661	14.0852	0.369295	3.05154
Catfish	9			Fin	RISU9F	0.749	-22.7094	14.394	-23.4767	14.026	0.388453	3.03413
Catfish	10	950	4.95	Muscle	RISU10M	0.697	-23.9071	14.2742	-23.9071	14.2742	0.296252	3.10711
Catfish	10			Plasma	RISU10P	0.663	-24.1428	15.4663	-23.191	14.466	0.449665	3.16354
Catfish	10			Blood	RISU10B	0.653	-23.0144	15.0195	-23.2915	14.5667	0.428119	3.19316
Catfish	10			Fin	RISU10F	0.736	-22.3616	14.7088	-23.1288	14.3409	0.462979	3.12672
Catfish	11	1130	9.86	Muscle	RISU11M	0.648	-22.6928	14.7648	-22.6928	14.7648	0.556377	3.2514
Catfish	11			Plasma	RISU10P	0.663	-24.1428	15.4663	-22.731	14.635	0.548201	3.21324
Catfish	11			Blood	RISU11B	0.679	-22.6451	14.8427	-22.9222	14.39	0.507248	3.14116
Catfish	11			Fin	RISU11F	0.724	-22.308	14.7277	-23.0753	14.3598	0.474442	3.13228
Catfish	12	1310	16.8	Muscle	RISU12M	0.742	-26.9977	14.9902	-26.9977	14.9902	-0.365836	3.31769
Catfish	12			Plasma	RISU12P	0.691	-24.5093	15.985	-23.5574	14.9848	0.371171	3.31611
Catfish	12			Blood	RISU12B	0.688	-23.1264	15.2758	-23.4035	14.823	0.404128	3.26853
Catfish	12			Fin	RISU12F	0.626	-22.3982	15.8265	-23.1655	15.4585	0.455124	3.45545
Catfish	12	1500	21.8	Muscle	RISU13M	0.685	-26.0337	14.6475	-26.0337	14.6475	-0.159313	3.21691
Catfish	12			Plasma	RISU13P	0.652	-23.912	15.7213	-22.9602	14.7211	0.49911	3.23855
Catfish	12			Blood	RISU13B	0.578	-22.1552	15.5476	-22.4323	15.0948	0.612198	3.34848
Catfish	12			Fin	RISU13F	0.648	-21.231	15.7975	-22.1655	15.985	0.669344	3.61029
Catfish	14	1360	16.8	Muscle	RISU14M	0.759	-23.8576	15.2995	-23.8576	15.2995	0.306857	3.40868
Catfish	14			Plasma	RISU14P	0.594	-24.0326	15.4103	-23.0807	14.41	0.473281	3.14707
Catfish	14			Blood	RISU14B	0.591	-22.3793	15.4305	-22.6564	14.9777	0.564174	3.31404
Catfish	14			Fin	RISU14F	0.579	-22.0201	15.0905	-22.7873	14.7225	0.536137	3.23898
Catfish	15	850	4.87	Muscle	RISU15M	0.696	-22.6464	15.5677	-22.6464	15.5677	0.566318	3.48755
Catfish	15			Plasma	RISU15P	0.743	-24.9638	15.2849	-24.0119	14.2847	0.273806	3.1102
Catfish	15			Blood	RISU15B	0.76	-24.0754	15.5429	-24.3525	15.0901	0.200835	3.3471
Catfish	15			Fin	RISU15F	0.689	-22.2126	15.5697	-22.9798	15.2018	0.494891	3.37993
Pike	1	69	2.4	Muscle	RIST1M	0.529	-21.7581	14.9897	-21.7581	14.9897	0.756627	3.31756
Pike	1			Plasma	RIST1P	0.637	-23.2967	15.131	-21.9379	14.6859	0.718111	3.2282
Pike	1			Blood	RIST1B	0.623	-22.4977	15.1588	-22.3419	15.0657	0.63156	3.33992
Pike	1			Fin	RIST1F	0.629	-21.2232	15.1323	-21.4783	14.6438	0.816566	3.21583
Pike	2	56	1.3	Muscle	RIST2M	0.637	-21.695	14.4924	-21.695	14.4924	0.770127	3.17128
Pike	2			Plasma	RIST2P	0.656	-23.6616	15.3902	-22.3027	14.9452	0.639947	3.30446
Pike	2			Blood	RIST2B	0.72	-21.9409	15.0458	-21.785	14.9527	0.750855	3.30668
Pike	2			Fin	RIST2F	0.573	-21.5015	15.1797	-21.7566	14.6912	0.756934	3.22977
Pike	3	53	1.1	Muscle	RIST3M	0.74	-21.9991	14.7717	-21.9991	14.7717	0.705	3.25344
Pike	3			Plasma	RIST3P	0.641	-22.8537	15.3435	-21.4948	14.8985	0.813015	3.29072
Pike	3			Blood	RIST3B	0.69	-21.796	15.0701	-21.6401	14.977	0.781891	3.31383
Pike	3			Fin	RIST3F	0.753	-21.3509	15.7891	-21.606	15.3006	0.789204	3.409
Pike	4	49	0.8	Muscle	RIST4M	0.675	-21.5832	15.1967	-21.5832	15.1967	0.794087	3.37845
Pike	4			Plasma	RIST4P	0.701	-22.2784	15.3818	-20.9195	14.9367	0.936272	3.30197
Pike	4			Blood	RIST4B	0.738	-21.7173	15.4132	-21.5614	15.3202	0.798748	3.41476
Pike	4			Fin	RIST4F	0.742	-20.7629	15.1931	-21.018	14.7047	0.915166	3.23373
Pike	5	57	1.3	Muscle	RIST5M	0.625	-21.9214	14.8624	-21.9214	14.8624	0.721643	3.28012
Pike	5			Plasma	RIST5P	0.688	-23.1369	15.5942	-21.778	15.1491	0.752347	3.36444
Pike	5			Blood	RIST5B	0.714	-22.1858	14.7669	-22.0299	14.6738	0.698395	3.22465
Pike	5			Fin	RIST5F	0.608	-21.7999	15.465	-22.055	14.9766	0.693012	3.3137
Pike	6	55	1.2	Muscle	RIST6M	0.636	-21.9367	15.1168	-21.9367	15.1168	0.718355	3.35493
Pike	6			Plasma	RIST6P	0.627	-22.8161	15.7761	-21.4573	15.331	0.821067	3.41795
Pike	6			Blood	RIST6B	0.761	-21.4781	15.3292	-21.3222	15.2361	0.850001	3.39004
Pike	6			Fin	RIST6F	0.615	-21.2912	16.0801	-21.5463	15.5917	0.801998	3.4946
Pike	7	87	5	Muscle	RIST7M	0.585	-22.5676	15.2919	-22.5676	15.2919	0.583206	3.40644
Pike	7			Plasma	RIST7P	0.698	-23.7178	15.643	-22.3589	15.1979	0.627911	3.37879
Pike	7			Blood	RIST7B	0.742	-22.83	15.3096	-22.6741	15.2165	0.560393	3.38428
Pike	7			Fin	RIST7F	0.554	-22.1346	15.4281	-22.3898	14.9397	0.621302	3.30285
Pike	8	62	1.7	Muscle	RIST8M	0.716	-21.5677	15.0359	-21.5677	15.0359	0.797404	3.33114
Pike	8			Plasma	RIST8P	0.599	-23.0158	15.5098	-21.657	15.0648	0.778287	3.33964
Pike	8			Blood	RIST8B	0.599	-21.9717	14.8393	-21.8158	14.7462	0.744257	3.24595
Pike	8			Fin	RIST8F	0.549	-21.522	15.4677	-21.7771	14.9793	0.75255	3.31449
Pike	9	62	1.7	Muscle	RIST9M	0.658	-22.0715	14.9984	-22.0715	14.9984	0.689471	3.32011
Pike	9			Plasma	RIST9P	0.567	-24.0629	15.0774	-22.704	14.6324	0.553979	3.21246
Pike	9			Blood	RIST9B	0.704	-21.9319	14.956	-21.776	14.8629	0.752776	3.28027
Pike	9			Fin	RIST9F	0.675	-22.1488	15.6966	-22.4039	15.2082	0.618272	3.38182
Pike	10	120	13.8	Muscle	RIST10M	0.743	-22.5762	14.1702	-22.5762	14.1702	0.581356	3.07654
Pike	10			Plasma	RIST10P	0.762	-24.1029	14.305	-22.744	13.86	0.545411	2.98528
Pike	10			Blood	RIST10B	0.645	-22.9804	14.322	-22.8245	14.2289	0.528172	3.09379
Pike	10			Fin	RIST10F	0.561	-22.5623	14.4352	-22.8175	13.9468	0.529678	3.01082
Pike	11	57	1.3	Muscle	RIST11M	0.721	-22.1466	14.7655	-22.1466	14.7655	0.673396	3.25162
Pike	11			Plasma	RIST11P	0.619	-23.3554	15.0295	-21.9965	14.5845	0.705546	3.19837
Pike	11			Blood	RIST11B	0.636	-22.2916	14.5719	-22.1357	14.4788	0.675727	3.16729
Pike	11			Fin	RIST11F	0.716	-21.8535	14.757	-22.1086	14.2686	0.68153	3.10546
Pike	12	47	0.7	Muscle	RIST12M	0.701	-21.8834	14.6863	-21.8834	14.6863	0.729786	3.22833
Pike	12			Plasma	RIST12P	0.741	-24.0566	15.4512	-22.6977	15.0061	0.555327	3.32239
Pike	12			Blood	RIST12B	0.67	-22.3528	14.4367	-22.197	14.3436	0.662604	3.12753
Pike	12			Fin	RIST12F	0.56	-21.94	15.4837	-22.1951	14.9952	0.662994	3.31919
Pike	12	71	2.5	Muscle	RIST13M	0.645	-21.5546	15.4719	-21.5546	15.4719	0.80021	3.45939
Pike	12			Plasma	RIST13P	0.576	-21.6639	16.1702	-20.305	15.7251	1.06791	3.53386
Pike	12			Blood	RIST13B	0.717	-21.8066	16.0375	-21.6507	15.9445	0.779617	3.59838
Pike	12			Fin	RIST13F	0.729	-21.0287	16.4774	-21.2838	15.989	0.858225	3.61146
Pike	14	97	8.5	Muscle	RIST14M	0.628	-21.9877	15.0713	-21.9877	15.0713	0.70743	3.34155
Pike	14			Plasma	RIST14P	0.747	-22.8857	15.4029	-21.5268	14.9578	0.806164	3.30818
Pike	14			Blood	RIST14B	0.576	-21.9743	15.7423	-21.8184	15.6492	0.7437	3.51153
Pike	14			Fin	RIST14F	0.706	-21.8042	15.7303	-22.0593	15.2418	0.692089	3.39172
Pike	15	98	7.7	Muscle	RIST15M	0.556	-22.4615	14.5555	-22.4615	14.5555	0.605928	3.18984
Pike	15			Plasma	RIST15P	0.714	-24.0774	15.099	-22.7185	14.654	0.550868	3.21881
Pike	15			Blood	RIST15B	0.532	-23.5922	14.4874	-23.4363	14.3944	0.397099	3.14247
Pike	15			Fin	RIST15F	0.707	-22.0903	14.8799	-22.3455	14.3915	0.630793	3.1416
Perch	1	320	0.45	Muscle	RIOU1M	0.75	-22.3471	12.378	-22.3471	12.378	0.63044	2.5494
Perch	1			Plasma	RIOK1P	0.738	-25.1674	14.8626	-21.7121	13.9753	0.766468	3.01921
Perch	1			Blood	RIOK1B	0.653	-22.8866	14.9917	-22.0521	14.238	0.693636	3.09648
Perch	1			Fin	RIOK1F	0.652	-21.385	15.7257	-21.5296	14.4818	0.805564	3.16818
Perch	2	310	0.41	Muscle	RIOU2M	0.687	-22.6512	12.4908	-22.6512	12.4908	0.565298	2.58258
Perch	2			Plasma	RIOK2P	0.525	-25.0604	14.9153	-21.6051	14.0279	0.789393	3.03469
Perch	2			Blood	RIOK2B	0.693	-22.9333	14.4168	-22.0988	13.6631	0.683637	2.92739
Perch	2			Fin	RIOK2F	0.741	-21.8775	15.1448	-22.0221	13.9009	0.700056	2.99733
Perch	3	250	0.2	Muscle	RIOU3M	0.717	-21.7715	11.2381	-21.7715	11.2381	0.753747	2.21416
Perch	3			Plasma	RIOK3P	0.585	-25.6719	14.3009	-22.2166	13.4135	0.65839	2.85398
Perch	3			Blood	RIOK3B	0.69	-23.4167	14.0647	-22.5822	13.311	0.580076	2.82382
Perch	3			Fin	RIOK3F	0.575	-22.136	14.6944	-22.2806	13.4505	0.644692	2.86486
Perch	4	290	0.35	Muscle	RIOU4M	0.669	-22.2806	11.7972	-22.2806	11.7972	0.644694	2.37858
Perch	4			Plasma	RIOK4P	0.544	-24.9328	14.7125	-21.4775	13.8252	0.816732	2.97506
Perch	4			Blood	RIOK4B	0.741	-23.1058	14.5353	-22.2713	13.7816	0.64668	2.96224
Perch	4			Fin	RIOK4F	0.684	-21.3478	15.4107	-21.4924	14.1668	0.813529	3.07554
Perch	5	300	0.38	Muscle	RIOK5M	0.714	-22.8642	14.5292	-22.8642	14.5292	0.519658	3.18212
Perch	5			Plasma	RIOK5P	0.757	-26.2459	14.7523	-22.7906	13.865	0.535423	2.98675
Perch	5			Blood	RIOK5B	0.669	-23.9436	14.6969	-23.109	13.9432	0.467214	3.00976
Perch	5			Fin	RIOK5F	0.56	-23.2338	15.3629	-23.3785	14.1191	0.409497	3.06149
Perch	6	250	0.2	Muscle	RIOK6M	0.588	-21.9507	13.8479	-21.9507	13.8479	0.715361	2.98174
Perch	6			Plasma	RIOK6P	0.714	-26.3423	13.9474	-22.887	13.06	0.51478	2.75001
Perch	6			Blood	RIOK6B	0.541	-23.408	13.5072	-22.5734	12.7535	0.581952	2.65985
Perch	6			Fin	RIOK6F	0.718	-22.155	14.2677	-22.2996	13.0238	0.640615	2.73936
Perch	7	320	0.45	Muscle	RIOK7M	0.769	-22.368	14.4424	-22.3021	14.2356	0.625957	3.15659
Perch	7			Plasma	RIOK7P	0.671	-26.1265	13.7285	-21.2722	13.6379	0.561008	2.68564
Perch	7			Blood	RIOK7B	0.663	-22.8068	14.4826	-21.5867	13.3225	0.710729	2.94673
Perch	7			Fin	RIOK7F	0.554	-22.5509	15.2303	-21.6933	13.8374	0.555804	3.02247
Perch	8	290	0.35	Muscle	RIOK8M	0.659	-22.3021	14.2356	-22.368	14.4424	0.640075	3.09578
Perch	8			Plasma	RIOK8P	0.547	-24.7275	14.5252	-22.6712	12.8412	0.860714	2.91998
Perch	8			Blood	RIOK8B	0.531	-22.4212	14.0762	-21.9723	13.7289	0.793331	2.82722
Perch	8			Fin	RIOK8F	0.542	-21.5487	15.0813	-22.6955	13.9864	0.770506	2.97864
Perch	9	270	0.26	Muscle	RIOK9M	0.597	-21.6818	14.4692	-21.6818	14.4692	0.772956	3.16446
Perch	9			Plasma	RIOK9P	0.588	-26.1531	14.3723	-22.6979	13.485	0.5553	2.875
Perch	9			Blood	RIOK9B	0.535	-23.7051	14.0941	-22.8706	13.3404	0.518289	2.83246
Perch	9			Fin	RIOK9F	0.605	-22.5764	15.0983	-22.721	13.8544	0.550339	2.98364
Perch	10	260	0.23	Muscle	RIOK10M	0.756	-22.5619	13.7873	-22.5619	13.7873	0.584416	2.96392
Perch	10			Plasma	RIOK10P	0.731	-26.3879	13.8302	-22.9326	12.9429	0.505008	2.71556
Perch	10			Blood	RIOK10B	0.71	-23.1888	14.383	-22.3543	13.6293	0.628898	2.91744
Perch	10			Fin	RIOK10F	0.573	-23.3208	14.3459	-23.4654	13.102	0.390868	2.76236
Rudd	1	310	0.4	Muscle	RIPE1M	0.647	-21.652	11.5861	-21.652	11.5861	0.779352	2.31651
Rudd	1			Plasma	RIPE1P		-22.5962	12.2779	-19.9051	10.9362	1.15357	2.12534
Rudd	1			Blood	RIPE1B	0.75	-22.6694	11.9359	-21.3731	11.8134	0.839101	2.38336
Rudd	1			Fin	RIPE1F	0.699	-22.0458	11.9002	-21.9728	11.6489	0.710616	2.33497
Rudd	2	320	0.5	Muscle	RIPE2M	0.693	-22.0081	10.8374	-22.0081	10.8374	0.703059	2.0963
Rudd	2			Plasma	RIPE2P	0.577	-24.5962	12.2779	-21.9051	10.9362	0.725119	2.12534
Rudd	2			Blood	RIPE2B	0.766	-23.2088	11.1344	-21.9125	11.0119	0.723548	2.14762
Rudd	2			Fin	RIPE2F	0.709	-21.9099	11.1754	-21.837	10.9241	0.739727	2.1218
Rudd	3	270	0.27	Muscle	RIPE3M	0.577	-22.9002	9.10581	-22.9002	9.10581	0.511953	1.587
Rudd	3			Plasma	RIPE3P		-25.3328	13.1651	-22.6418	11.8233	0.567313	2.38626
Rudd	3			Blood	RIPE3B	0.718	-24.3087	10.4157	-23.0124	10.2932	0.487926	1.93625
Rudd	3			Fin	RIPE3F	0.636	-23.3037	9.58349	-23.2307	9.33219	0.441149	1.65359
Rudd	4	320	0.45	Muscle	RIPE4M	0.587	-22.7248	9.89982	-22.7248	9.89982	0.549525	1.82053
Rudd	4			Plasma	RIPE4P		-25.6728	13.1651	-22.9818	11.8233	0.494477	2.38626
Rudd	4			Blood	RIPE4B	0.66	-24.3133	10.4666	-23.017	10.3441	0.486936	1.95121
Rudd	4			Fin	RIPE4F	0.704	-22.4956	10.4341	-22.4226	10.1828	0.614269	1.90375
Rudd	5	320	0.45	Muscle	RIPE5M	0.64	-22.3214	11.5316	-22.3214	11.5316	0.635946	2.30047
Rudd	5			Plasma	RIPE5P		-24.9817	12.9123	-22.2907	11.5705	0.642528	2.31192
Rudd	5			Blood	RIPE5B	0.597	-23.255	11.4914	-21.9587	11.369	0.713645	2.25264
Rudd	5			Fin	RIPE5F	0.746	-22.1934	11.8068	-22.1204	11.5555	0.679003	2.30749
Rudd	6	320	0.45	Muscle	RIPE6M	0.655	-22.0636	10.7466	-22.0636	10.7466	0.691173	2.0696
Rudd	6			Plasma	RIPE6P	0.741	-25.7728	14.1651	-23.0818	12.8233	0.473055	2.68038
Rudd	6			Blood	RIPE6B	0.692	-24.0007	11.3459	-22.7043	11.2235	0.553911	2.20985
Rudd	6			Fin	RIPE6F	0.598	-22.3562	11.1495	-22.2832	10.8982	0.644123	2.11419
Rudd	7	320	0.45	Muscle	RIPE7M	0.566	-22.5026	10.7113	-22.5026	10.7113	0.597127	2.0592
Rudd	7			Plasma	RIPE7P	0.712	-25.0817	11.9123	-22.3907	10.5705	0.621106	2.0178
Rudd	7			Blood	RIPE7B	0.541	-23.8697	10.8291	-22.5734	10.7066	0.581956	2.05783
Rudd	7			Fin	RIPE7F	0.624	-22.6363	10.4614	-22.5633	10.2101	0.584118	1.91178
Rudd	8	300	0.37	Muscle	RIPE8M	0.564	-22.7059	9.74977	-22.7059	9.74977	0.553571	1.7764
Rudd	8			Plasma	P		-25.5782	10.3534	-22.8872	9.0116	0.514736	1.55929
Rudd	8			Blood	RIPE8B	0.544	-24.0896	9.81821	-22.7933	9.69574	0.534859	1.76051
Rudd	8			Fin	RIPE8F	0.757	-22.4906	9.685	-22.4176	9.4337	0.615328	1.68344
Rudd	9	280	0.3	Muscle	RIPE9M	0.618	-22.781	8.798	-22.781	8.798	0.537495	1.49647
Rudd	9			Plasma	RIPE9P	0.618	-24.5782	9.35337	-21.8872	8.0116	0.728961	1.26518
Rudd	9			Blood	RIPE9B	0.573	-23.7673	8.34194	-22.471	8.21948	0.603895	1.32632
Rudd	9			Fin	RIPE9F	0.672	-22.5928	8.69208	-22.5198	8.44078	0.593443	1.3914
Rudd	10	310	0.33	Muscle	RIPE10M	0.577	-22.2573	10.7007	-22.2573	10.7007	0.649674	2.0561
Rudd	10			Plasma	RIPE10P	0.606	-23.9229	10.7568	-21.2319	9.41501	0.869337	1.67794
Rudd	10			Blood	RIPE10B	0.757	-23.0199	10.6106	-21.7235	10.4882	0.764021	1.99358
Rudd	10			Fin	RIPE10F	0.603	-22.0419	10.8422	-21.9689	10.5909	0.711464	2.02379
Rudd	11	320	0.45	Muscle	RIPE11M	0.602	-22.5371	11.4423	-22.5371	11.4423	0.589738	2.2742
Rudd	11			Plasma	RIPE11P	0.758	-25.6946	11.9448	-23.0035	10.6031	0.489816	2.02737
Rudd	11			Blood	RIPE11B	0.683	-23.9714	10.8645	-22.6751	10.742	0.560177	2.06825
Rudd	11			Fin	RIPE11F	0.752	-23.0855	11.0476	-23.0125	10.7963	0.487892	2.08422
Rudd	12	300	0.37	Muscle	RIPE12M	0.708	-22.6555	10.3633	-22.6555	10.3633	0.564364	1.95685
Rudd	12			Plasma	RIPE12P	0.671	-24.9333	10.8279	-22.2423	9.48609	0.652898	1.69885
Rudd	12			Blood	RIPE12B	0.535	-23.46	10.4479	-22.1637	10.3254	0.669734	1.94571
Rudd	12			Fin	RIPE12F	0.768	-24.0855	11.0364	-23.0125	10.7963	0.487892	2.08422
Rudd	12	310	0.4	Muscle	RIPE13M	0.524	-22.3596	10.6523	-22.3596	10.6523	0.627756	2.04186
Rudd	12			Plasma	RIPE13P	0.705	-26.1	11.1507	-23.409	9.80896	0.402957	1.79381
Rudd	12			Blood	RIPE13B	0.61	-24.2971	10.4117	-23.0008	10.2893	0.490398	1.93508
Rudd	12			Fin	RIPE13F	0.571	-23.3156	10.6994	-23.2426	10.4481	0.438601	1.98179
